# Supplementary material for: Endosomal NOX2 oxidase exacerbates virus pathogenicity and is a target for antiviral therapy
Source: PubMed Central journal article supplement (PMC5507984; doi:10.1038/s41467-017-00057-x), 2017-07-12
Supplement: 41467_2017_57_MOESM1_ESM.pdf [file 41467_2017_57_MOESM1_ESM.pdf]

File name: Supplementary Information

Description: Supplementary Figures and Supplementary Tables

File name: Peer Review File

Description:

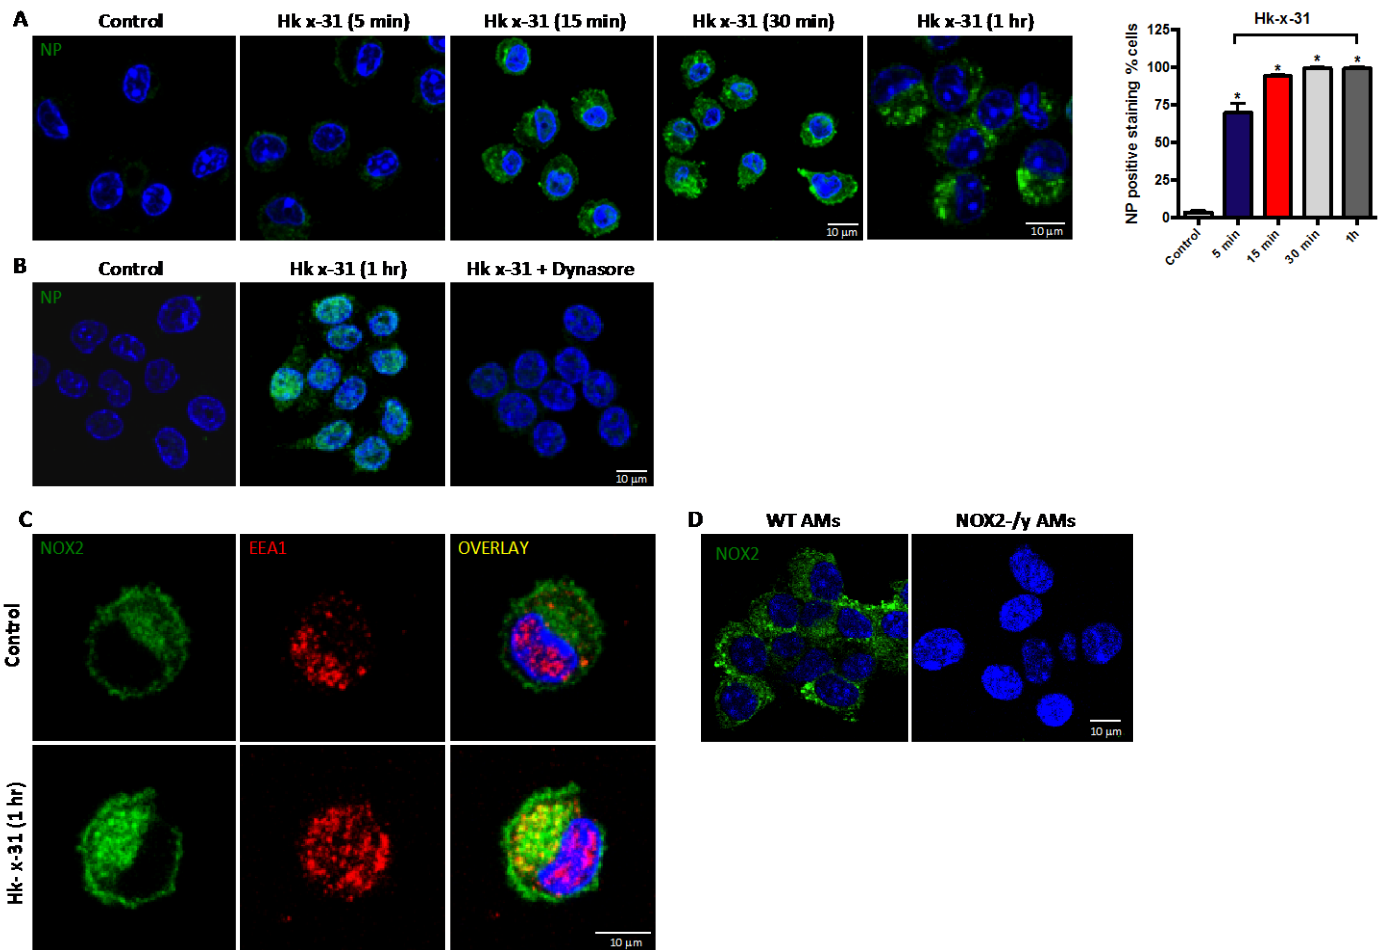

**Supplementary Figure 1. Dynamin-dependent endocytosis of influenza A virus and entry into early endosomes expressing NOX2 oxidase.**

(A, B) Confocal microscopy of WT mouse primary alveolar macrophages that were infected with the HKx31 strain of influenza A virus (MOI of 10 at various time points) in the absence and presence of the dynamin inhibitor, Dynasore (100  $\mu$ M), and then labeled as indicated with antibody to influenza A virus nucleoprotein (NP) and 4',6'-diamidino-2-phenylindole (DAPI) (n=5). (C) Alveolar macrophages infected with influenza A virus as in (A), and then labeled with the early endosome antigen 1 (EEA1) antibody and NOX2 antibody. (D) WT and NOX2<sup>-/-</sup> alveolar macrophages were labeled with the NOX2 antibody and DAPI. (A-D) Images are representative of > 100 cells analysed over each experiment. Original magnification X100. Data are shown as mean  $\pm$  SE. One-way ANOVA followed by Dunnett's *post hoc* test for multiple comparisons. \* P<0.05 compared to control.

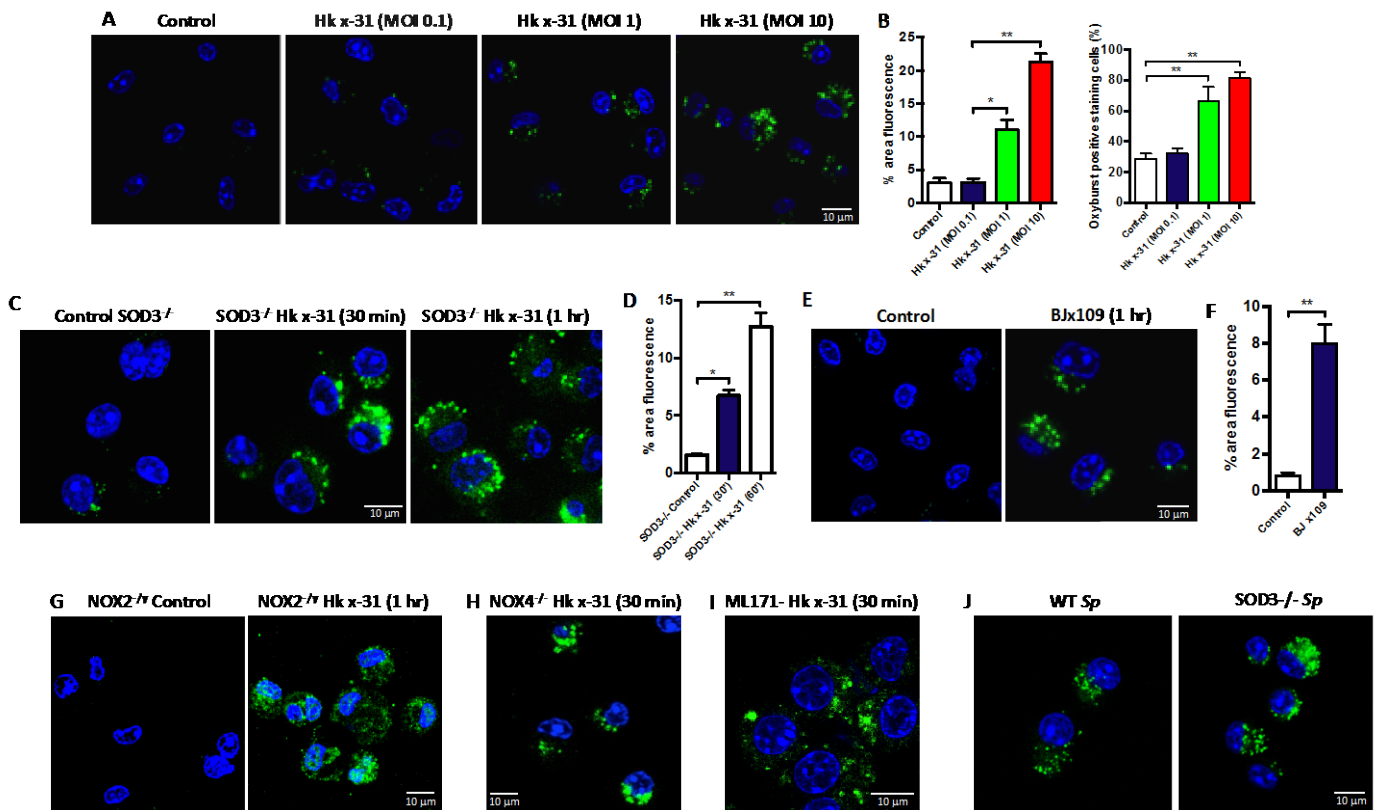

**Supplementary Figure 2. Influenza A viruses induce dose-dependent elevations in endosomal NOX2 oxidase-dependent ROS production.**

(A, B) Endosomal ROS production in wild-type (WT) mouse primary alveolar macrophages as assessed by OxyBURST (100  $\mu$ M) confocal fluorescence microscopy in the absence or presence of various doses of HKx31 virus (MOI of 0.1, 1 and 10) and labeled with DAPI (n=5). (C, D) Endosomal ROS production following infection with the HKx31 virus in alveolar macrophages taken from superoxide dismutase 3 deficient (SOD3<sup>-/-</sup>) mice (n=5). (E, F) Endosomal ROS production in WT alveolar macrophages following infection with the BJx109 virus (n=6). (G) Influenza nucleoprotein fluorescence in alveolar macrophages taken from NOX2<sup>-/-</sup> mice demonstrating that influenza internalization is unaffected by the expression of NOX2 (n=3). (H and I) Endosomal ROS production in H) NOX4<sup>-/-</sup> mouse primary alveolar macrophages or I) WT mouse primary alveolar macrophages treated with the NOX1 inhibitor ML171 (100nM) as assessed by OxyBURST fluorescence microscopy in the presence of HKx31 virus and labeled with DAPI (n=5). (J) Phagosomal ROS production to *Streptococcus pneumoniae* (*Sp*) as assessed by OxyBURST fluorescence microscopy in WT or SOD3<sup>-/-</sup> alveolar macrophages (n=3). (A, C, E, G, H, I, J) Images are representative of >100 cells analysed over each experiment. Original magnification X100. All data are represented as mean  $\pm$  SEM. (B and D) One-way ANOVA followed by Dunnett's *post hoc* test for multiple comparisons. \* P<0.05 comparisons indicated by horizontal bars. \*\*P<0.01. (F) Unpaired t-test; statistical significance taken when the P<0.05. \*\* P<0.01

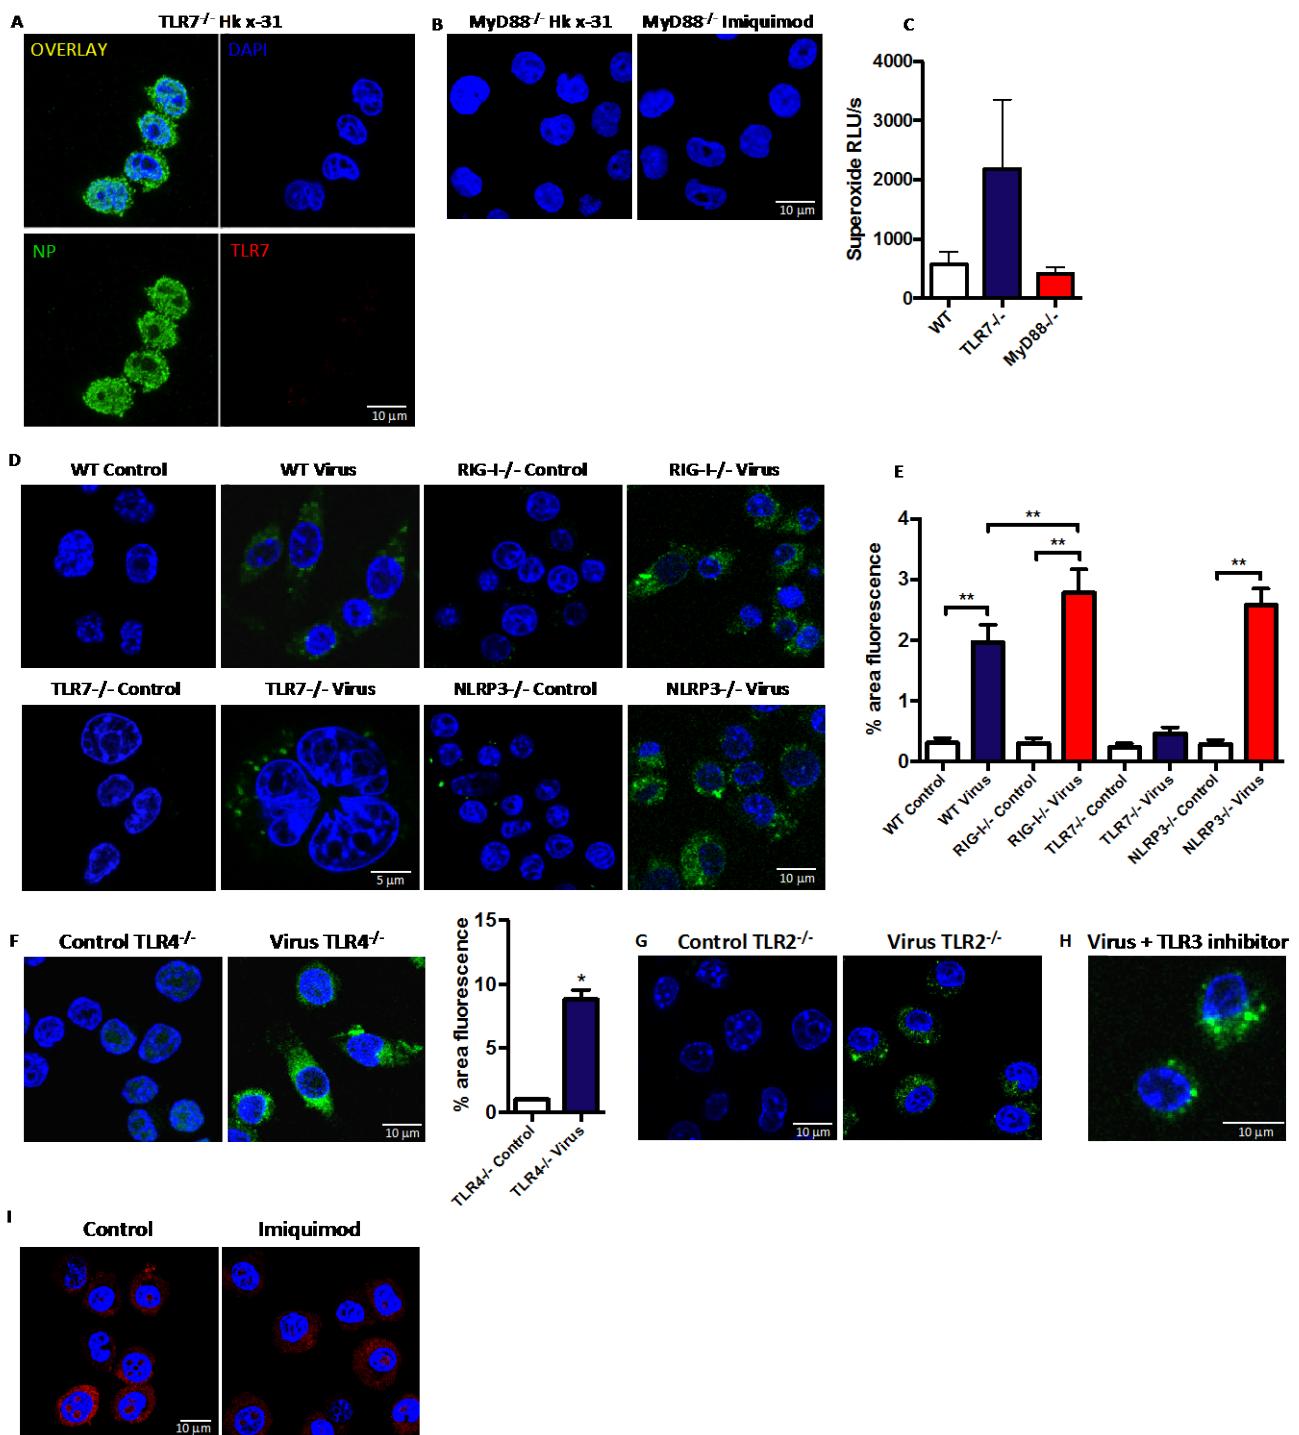

**Supplementary Figure 3. Endosomal ROS production to influenza A virus is dependent on MyD88 but independent of RIG-I, NLRP3, TLR2, TLR3, and TLR4.**

(A) TLR7<sup>-/-</sup> immortalized bone marrow-derived macrophages (BMDMs) were infected with HKx31 influenza A virus ((MOI of 10) and then stained with anti-TLR7 antibody and anti nucleoprotein (NP) antibody, and then DAPI (n=3). (B) MyD88<sup>-/-</sup> immortalized BMDMs were infected with HKx31 influenza A virus ((MOI of 10) or exposed to imiquimod (10 µg/mL) and endosomal ROS production was assessed by OxyBURST (100 µM) fluorescence microscopy (n=3). (C) Phorbol-dibutyrate-stimulated, NOX2 oxidase-dependent superoxide production in WT, TLR7<sup>-/-</sup> and MyD88<sup>-/-</sup> immortalized bone marrow-derived macrophages measured by L-O12 (100 µM)-enhanced chemiluminescence (n=3); RLU/s= relative light units/sec. (D-G) Endosomal ROS production in WT, RIG-I<sup>-/-</sup>, TLR7<sup>-/-</sup>, and NLRP3<sup>-/-</sup> and (F) TLR4<sup>-/-</sup> or (G) TLR2<sup>-/-</sup> BMDMs, as assessed by OxyBURST fluorescence microscopy in the absence or presence of HKx31 virus and co-labeled with DAPI (n=3-5). (H) WT mouse primary alveolar macrophages were infected with HKx31 virus (MOI of 10) in the presence of the TLR3 inhibitor (50 µM, n=3). (I) WT mouse primary alveolar macrophages were treated with imiquimod (10µg/mL) for 60 mins and mitochondrial superoxide measured by MitoSOX confocal fluorescence microscopy and co-labeled with DAPI (n=3). (A, B, D, F, G, H and I) Images are representative of >100 cells analyzed over each experiment. Original magnification X100. All data are represented as mean ± SEM. (E) One-way ANOVA followed by Dunnett's *post hoc* test for multiple comparisons. \* P<0.05 and \*\*P<0.01 comparisons indicated by horizontal bars. (F) Unpaired t-test; statistical significance taken when the P<0.05.

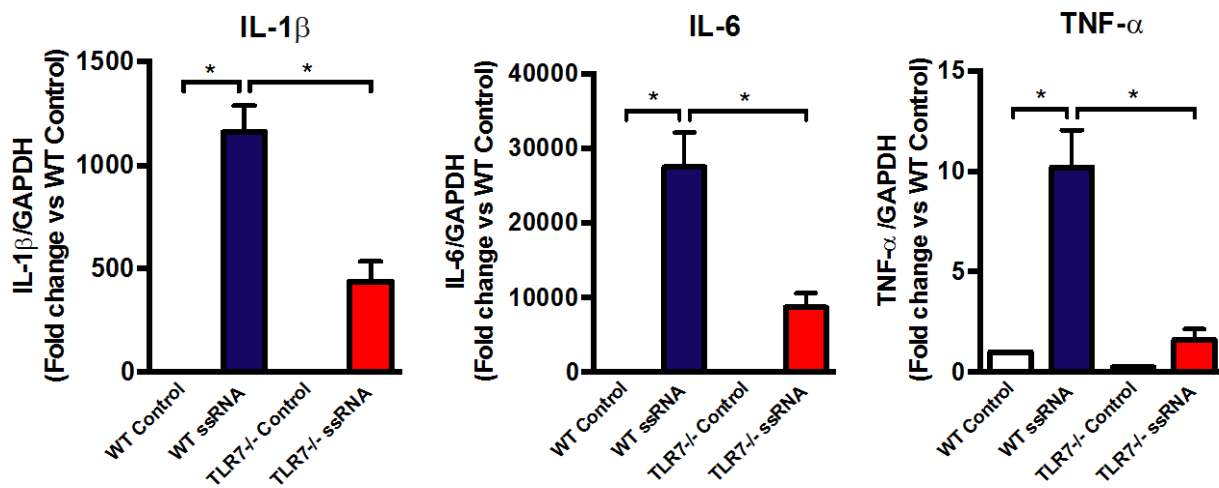

**Supplementary Figure 4. Single stranded RNA (ssRNA) drives IL-1 $\beta$ , TNF- $\alpha$  and IL-6 mRNA expression via a TLR7-dependent mechanism in macrophages.**

WT and TLR7<sup>-/-</sup> immortalized bone marrow derived macrophages were treated with ssRNA lyoVec (100  $\mu$ M) and cytokine expression was determined by QPCR after 24 h. Kruskal-Wallis test with Dunn's *post hoc* for multiple comparisons. All data are represented as mean  $\pm$  SEM. Statistical significance was taken when the P < 0.05 (n=6).

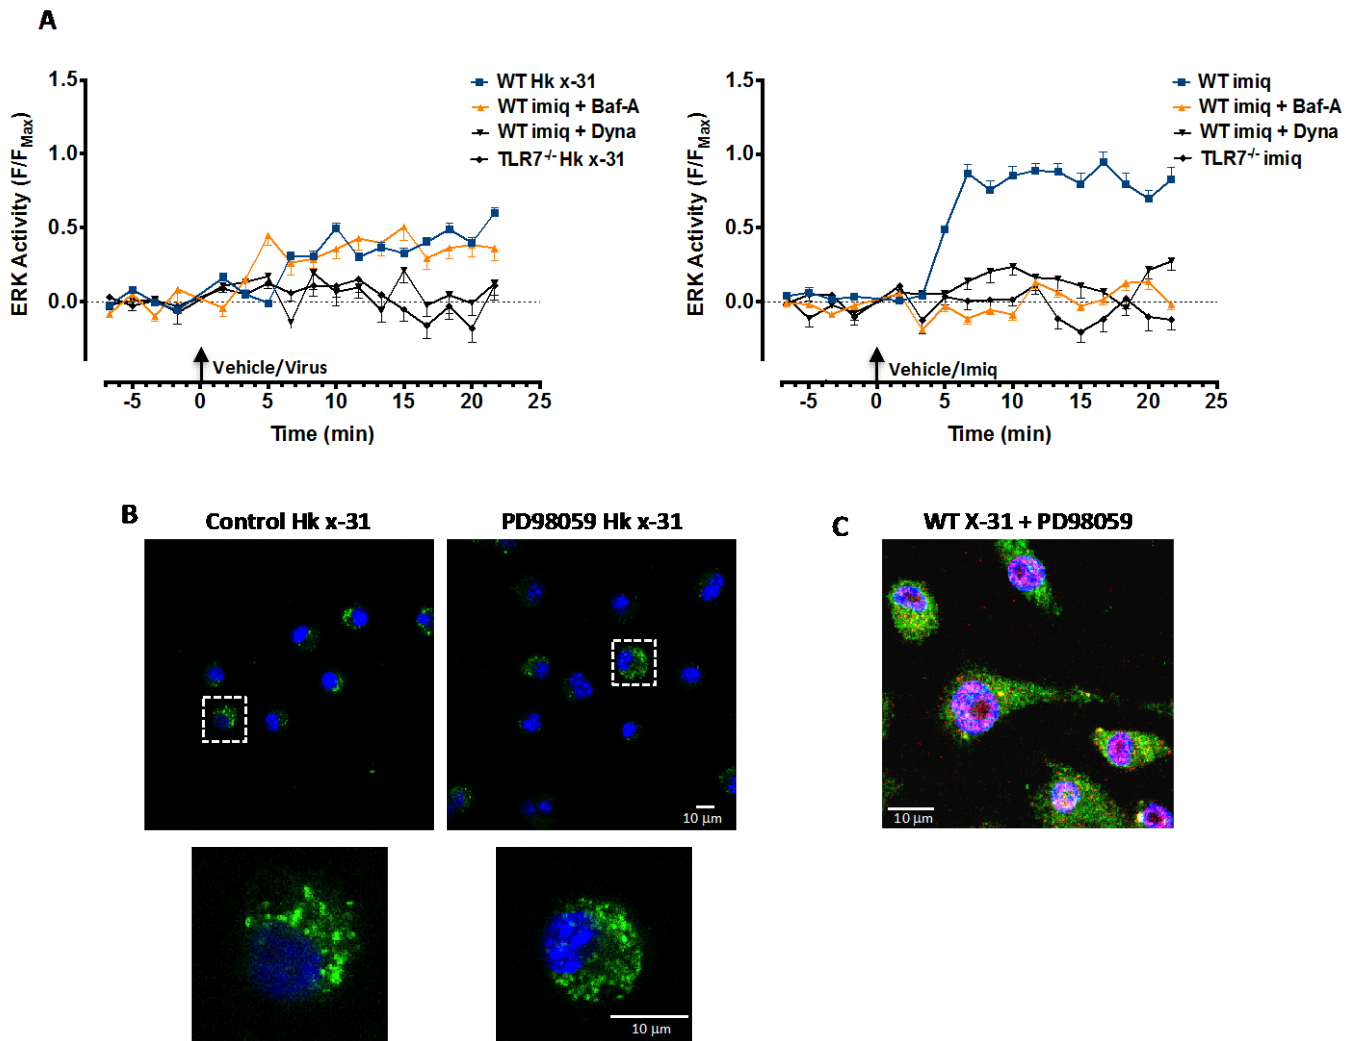

**Supplementary Figure 5. Influenza A virus and imiquimod trigger ERK1/2-phosphorylation in a TLR7-dependent manner whereas ERK does not contribute to activation of NOX2 oxidase.**

**(A)** Cytosolic ERK activity as assessed by high content ratiometric FRET imaging analysis in WT and TLR7<sup>-/-</sup> immortalized bone marrow-derived macrophages (BMDMs). Cells were either treated with vehicle controls or with bafilomycin A (Baf-A; 100 nM) or Dynasore (Dyna; 100 μM) and then exposed for 25 min to HKx31 influenza A virus (MOI of 10) or imiquimod (imiq; 10 μg/ml). All data are represented as mean ± SEM (n=3). **(B)** Endosomal superoxide production to HKx31 influenza A virus in WT alveolar macrophages as assessed by OxyBURST (100 μM) fluorescence microscopy in the absence or presence of the MEK inhibitor PD98059 (30 μM). **(C)** Immunofluorescence microscopy for assessment of NOX2 and p47phox association. WT immortalized BMDMs were infected with HKx31 virus, (MOI of 10) in the presence of PD98059 (30 μM) and then labeled with antibodies to NOX2 and p47phox. All images are representative of >100 cells analyzed over each experiment. Original magnification X100. (n=4).

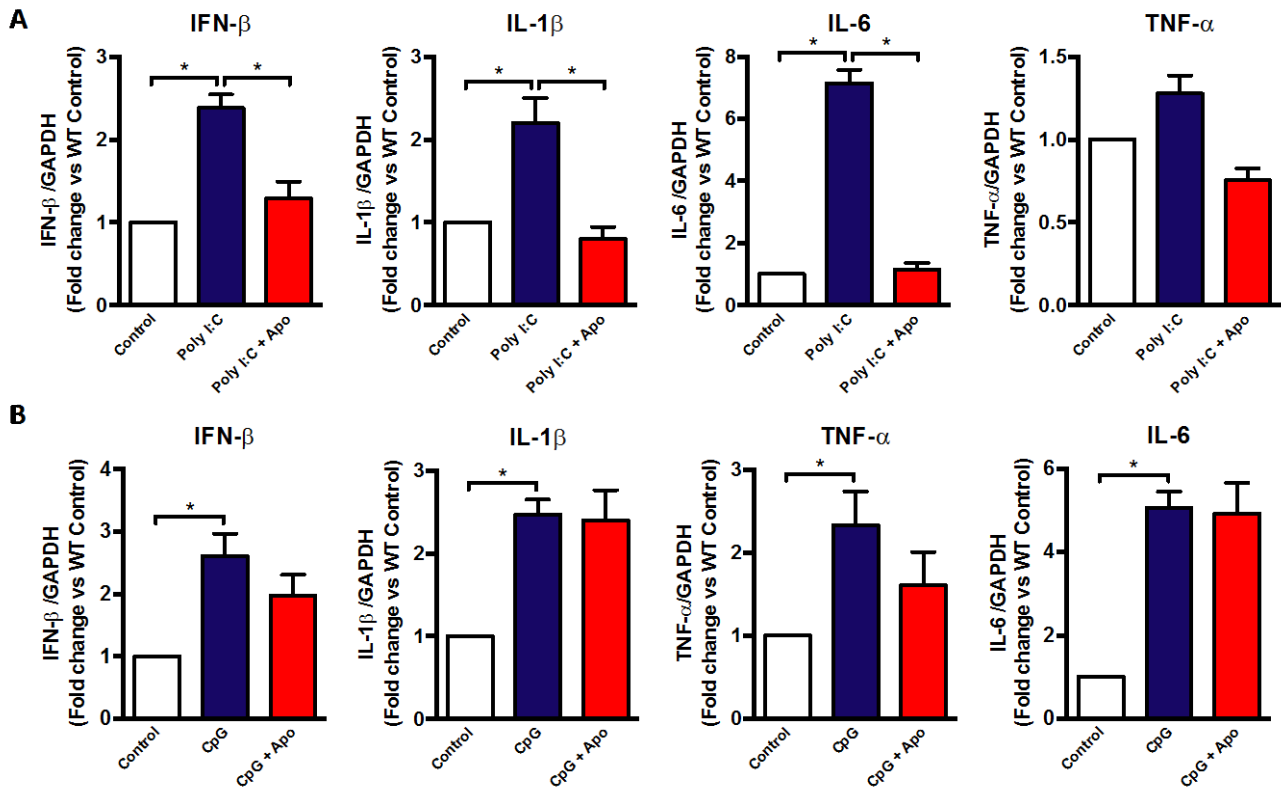

**Supplementary Figure 6. Effect of NOX2 oxidase inhibition on cytokine expression by TLR3 agonist, poly I:C, or TLR9 agonist CpG.** WT immortalized bone marrow derived macrophages were treated with **A**) poly I:C (25  $\mu\text{g}/\text{mL}$ ) or **B**) CpG (10 $\mu\text{g}/\text{mL}$ ) in the absence or presence of apocynin (Apo; 300  $\mu\text{M}$ ) and cytokine expression was determined by QPCR after 24 h (n=6). Responses are relative to GAPDH and then expressed as a fold-change above controls. All data are represented as mean  $\pm$  SEM. Kruskal-Wallis test with Dunn's *post hoc* for multiple comparisons. Statistical significance was taken when the  $P < 0.05$ . \*  $P < 0.05$ .

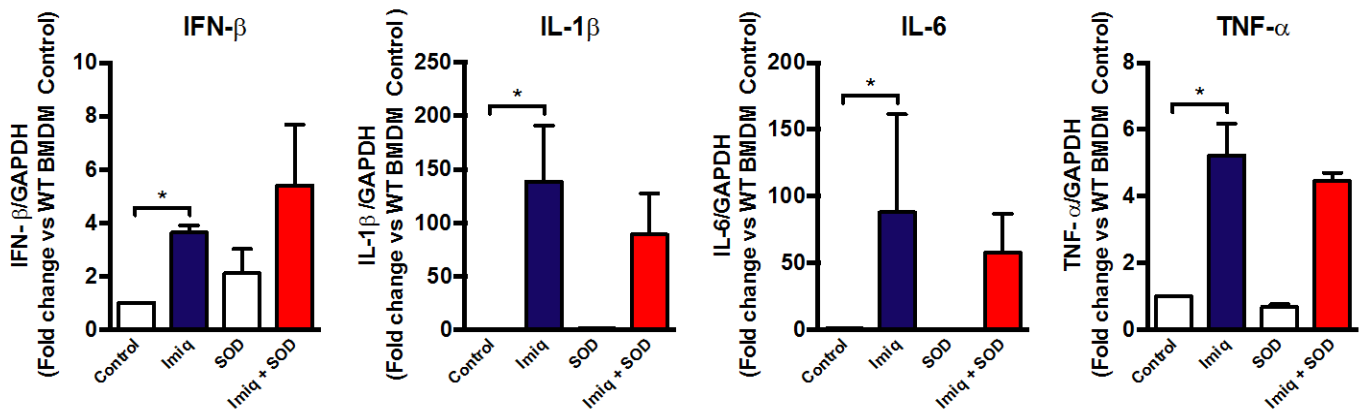

**Supplementary Figure 7. TLR7-dependent cytokine production to imiquimod is unaffected by endosomal superoxide production.**

WT immortalized bone marrow derived macrophages were treated with imiquimod (Imiq; 10  $\mu$ g/mL) in the absence or presence of superoxide dismutase (SOD; 300 U/mL) and cytokine expression was determined by QPCR after 24 h. Responses are relative to GAPDH and then expressed as a fold-change above WT controls. All data are represented as mean  $\pm$  SEM. Kruskal-Wallis test with Dunn's *post hoc* for multiple comparisons. Statistical significance was taken when the  $P < 0.05$ . \*  $P < 0.05$  (n=6).



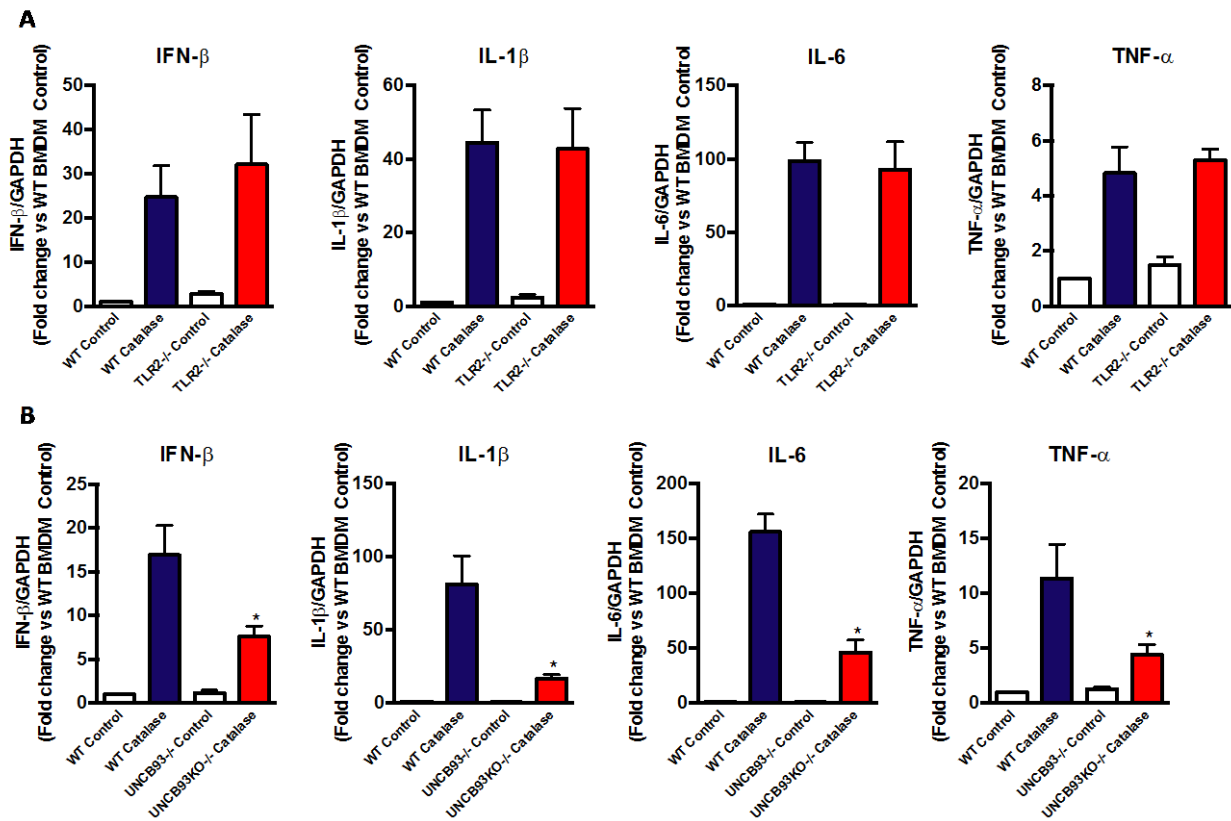

**Supplementary Figure 8. Catalase-dependent elevation in cytokine expression is suppressed by deletion of UNCB93 but not by TLR2 deletion.**

(A) WT and TLR2<sup>-/-</sup> immortalized bone marrow derived macrophages (BMDMs) were treated with catalase (1000 U/mL) for 1hr and cytokine mRNA expression determined by QPCR after 24 h (n=6). (B) WT and UNCB93<sup>-/-</sup> immortalized BMDMs were treated with catalase (1000 U/mL) for 1hr and cytokine mRNA expression determined by QPCR after 24 h (n=6). Responses are relative to GAPDH and then expressed as a fold-change above WT controls. All data are represented as mean ± SEM. Kruskal-Wallis test with Dunn's *post hoc* for multiple comparisons. Statistical significance was taken when the P<0.05. \* P<0.05.

|       |                                                            |    |
|-------|------------------------------------------------------------|----|
| TLR3  | -----MRQTLPCIY-----FWGGLLPF-----GML                        | 20 |
| TLR9  | -----MGFCRSA-----LHP---LS-----LLVQAIMLAMTLALGTLPA-----FLP  | 34 |
| TLR7  | -----MVFPMWTLKRLILILF---NIILISKLLGARWFPK-----TLP           | 35 |
| TLR8  | MKESSLQNSSCSLGKETKKENMFLQSSMLTICIFLLISGSELCAEENFSR-----SYP | 53 |
| TLR5  | -----MGDHLDDL---LGVVLMAGPVFG-----IPS                       | 23 |
| TLR4  | -----MMSASRLAGTL---I---PAMAFSLCVRPE-----SWEP               | 28 |
| TLR2  | -----MP---HT---LWMVWVVGVIISLSKEESSNQA                      | 26 |
| TLR10 | -----MRLIRNIYIFC---SIVMTAEGDAPE-----                       | 23 |
| TLR1  | -----MTSIFHFA---IIFMLILQIRIQ-----                          | 20 |
| TLR6  | -----MTKDKEPIVKSFHFV---CLMIIVGTRIQ-----                    | 27 |

|       |                                                                                        |     |
|-------|----------------------------------------------------------------------------------------|-----|
| TLR3  | <b>C36</b><br>CASSTTKCTVSHEVAD <b>C51</b> SHLKLTVQVPD---DLPTNITVNLNLTHNQLRRLPAANFTRYSQ | 76  |
| TLR9  | CEL-QP-----HGLVNC <b>C51</b> NWFLKSVPHFSMAAPRGNVTSLSLSSNRHHHLDSDFAHLPS                 | 88  |
| TLR7  | QDV-TLDVPKNHVIVDC <b>C51</b> TDKHLTEIPG---GIPTNTNLTTLINHIIPDISPASFHRLDH                | 90  |
| TLR8  | QDE-KK---QNDSVIAB <b>C51</b> SNRRLQEVPO---TVGKYVTELDLSDNFITHITNESFQGLQN                | 106 |
| TLR5  | CSF-----DGRIAFYR---FCNLTQVPQ---VL-NTTERLLLSFNIRTVTASSFPFLEQ                            | 71  |
| TLR4  | QVE-----VVPNITY <b>C51</b> C <b>C51</b> MELNFYKIPD---NLPFSTKNLDLSEFNPLRHLGYSFFSFPE     | 79  |
| TLR2  | SLS-----CDRNGICK <b>C51</b> SSGSLNSIPS---GLTEAVKSLDLSNNRITYISNSDLQRCVN                 | 77  |
| TLR10 | QLP-----EEREELMT <b>C51</b> CSNMSLRKVPA---DLTPATTTLDLSYNLLFQLQSSDFHSVSK                | 73  |
| TLR1  | QLS-----EESEFLVDR <b>C51</b> SKNGLIHVPK---DLSQKTTILNISQNYISELWTSDILSLSK                | 70  |
| TLR6  | QLFS-----DGNEFAVD <b>C51</b> SKRGLIHVPK---DLPLKTKVLDMSQNYIAELQVSDMSFLSE                | 77  |

: \* : \* : : :

|       |                                                                                                                                                                                                                                           |     |
|-------|-------------------------------------------------------------------------------------------------------------------------------------------------------------------------------------------------------------------------------------------|-----|
| TLR3  | LTSLDVCF <b>C98</b> NT <b>C100</b> ISK-----LEPELCQKLPMLKVLNLQHNELSQLSDKTF AFC                                                                                                                                                             | 122 |
| TLR9  | LRHLNLK <b>C98</b> W <b>C100</b> PPVGLSPMH---EPCHMTIEPSTFLAVPTLEELNLSYNNIMTVP---ALP                                                                                                                                                       | 142 |
| TLR7  | LVEIDF <b>C98</b> CF <b>C100</b> PIPLGSKNN <b>C112</b> CIKRLQIKPRFSFGLTYLKSLYLDGNQLEIPQ---GLP                                                                                                                                             | 147 |
| TLR8  | LT <b>C98</b> KINL <b>C100</b> NP <b>C112</b> IVQHONGNPGIQ <b>C112</b> SNGLNITDGAFNLK <b>C112</b> NLRELLLEDNQLPQIPS---GLP                                                                                                                 | 163 |
| TLR5  | LQ <b>C98</b> LELC <b>C100</b> SD <b>C112</b> Y <b>C112</b> TPL-----TIDKEAFRNLPLRILDIGSSKIYFLHPDAFQGL                                                                                                                                     | 118 |
| TLR4  | LQ <b>C98</b> VLDL <b>C100</b> SR <b>C112</b> CE <b>C112</b> IQ-----TIEDGAYQSLSHLSTLILTG <b>C112</b> NP <b>C112</b> IQSLALGAFSGL                                                                                                          | 125 |
| TLR2  | LQ <b>C98</b> ALV <b>C100</b> L <b>C112</b> SN <b>C112</b> GIN-----TIEEDSFSSLSLEHLDLSYNL <b>C112</b> SNLSSSWFKPL                                                                                                                          | 123 |
| TLR10 | LR <b>C98</b> VLIL <b>C100</b> CH <b>C112</b> N <b>C112</b> RIQ-----QLDLK <b>C112</b> T <b>C112</b> FEFN <b>C112</b> KELRYLDLSNNRLKSVT---WYLL                                                                                             | 116 |
| TLR1  | LR <b>C98</b> LIL <b>C100</b> IS <b>C112</b> EN <b>C112</b> RIQ-----YLDIS <b>C112</b> V <b>C112</b> FK <b>C112</b> FN <b>C112</b> Q <b>C112</b> E <b>C112</b> LEYLDLSHN <b>C112</b> KL <b>C112</b> V <b>C112</b> KIS---CHPT               | 113 |
| TLR6  | LT <b>C98</b> VLR <b>C100</b> L <b>C112</b> IS <b>C112</b> EN <b>C112</b> RIQ-----LLDLS <b>C112</b> V <b>C112</b> FK <b>C112</b> FN <b>C112</b> Q <b>C112</b> D <b>C112</b> LEYLDLSHN <b>C112</b> QL <b>C112</b> Q <b>C112</b> KIS---CHPI | 120 |

\* : . : \* \* \* . : :

|       |                                                                                                                                                                                                                                                                                                                                                                                                                                                                                              |     |
|-------|----------------------------------------------------------------------------------------------------------------------------------------------------------------------------------------------------------------------------------------------------------------------------------------------------------------------------------------------------------------------------------------------------------------------------------------------------------------------------------------------|-----|
| TLR3  | TNLTELH <b>C183</b> LM <b>C189</b> SN <b>C183</b> SI <b>C189</b> Q <b>C183</b> K <b>C189</b> IK <b>C183</b> NN <b>C189</b> PF <b>C183</b> V <b>C189</b> K-----Q <b>C183</b> KN <b>C189</b> LI                                                                                                                                                                                                                                                                                                | 150 |
| TLR9  | KSLISLSL <b>C183</b> SHT <b>C189</b> NI <b>C183</b> LM <b>C189</b> LD <b>C183</b> S <b>C189</b> LAG <b>C183</b> L <b>C189</b> HAL <b>C183</b> R <b>C189</b> FL <b>C183</b> MD <b>C189</b> GN <b>C183</b> CY <b>C189</b> KN <b>C183</b> PC <b>C189</b> R <b>C183</b> Q <b>C189</b> ALE <b>C183</b> V <b>C189</b> AP <b>C183</b> G <b>C189</b> ALL <b>C183</b> GL <b>C189</b> GN <b>C183</b> LT                                                                                                | 202 |
| TLR7  | PSLQ <b>C183</b> LL <b>C189</b> SLE <b>C183</b> ANN <b>C189</b> IF <b>C183</b> SIR <b>C189</b> KEN <b>C183</b> L <b>C189</b> TEL <b>C183</b> ANI <b>C189</b> E <b>C183</b> IL <b>C189</b> YG <b>C183</b> Q <b>C189</b> NC <b>C183</b> Y <b>C189</b> R <b>C183</b> NC <b>C189</b> V <b>C183</b> YS <b>C189</b> IE <b>C183</b> K <b>C189</b> DA <b>C183</b> FL <b>C189</b> N <b>C183</b> TK <b>C189</b> L <b>C183</b> K                                                                        | 207 |
| TLR8  | ESLTEL <b>C183</b> SLI <b>C189</b> Q <b>C183</b> NN <b>C189</b> I <b>C183</b> Y <b>C189</b> NI <b>C183</b> T <b>C189</b> KE <b>C183</b> GI <b>C189</b> S <b>C183</b> RL <b>C189</b> IN <b>C183</b> L <b>C189</b> KN <b>C183</b> LY <b>C189</b> L <b>C183</b> AW <b>C189</b> NC <b>C183</b> Y <b>C189</b> FN <b>C183</b> K <b>C189</b> V <b>C183</b> CE <b>C189</b> K-T <b>C183</b> NI <b>C189</b> ED <b>C183</b> GV <b>C189</b> F <b>C183</b> ET <b>C189</b> LT <b>C183</b> N <b>C189</b> LE | 222 |
| TLR5  | FHL <b>C183</b> FEL <b>C189</b> RL <b>C183</b> LY <b>C189</b> FC <b>C183</b> GL-----SD <b>C183</b> AV <b>C189</b> L <b>C183</b> K <b>C189</b> D <b>C183</b> G <b>C189</b> Y <b>C183</b> FR <b>C189</b> N <b>C183</b> L <b>C189</b> K <b>C183</b> AL <b>C189</b> T                                                                                                                                                                                                                            | 148 |
| TLR4  | SSL <b>C183</b> Q <b>C189</b> KL <b>C183</b> V <b>C189</b> AV <b>C183</b> ET-----NL <b>C183</b> AS <b>C189</b> LEN <b>C183</b> FP <b>C189</b> I <b>C183</b> GH <b>C189</b> L <b>C183</b> KT <b>C189</b> L <b>C183</b> K                                                                                                                                                                                                                                                                      | 153 |
| TLR2  | -----SS <b>C183</b> LT                                                                                                                                                                                                                                                                                                                                                                                                                                                                       | 127 |
| TLR10 | -----AG <b>C183</b> LR                                                                                                                                                                                                                                                                                                                                                                                                                                                                       | 120 |
| TLR1  | -----VN <b>C183</b> L <b>C189</b> K                                                                                                                                                                                                                                                                                                                                                                                                                                                          | 117 |
| TLR6  | -----VS <b>C183</b> FR                                                                                                                                                                                                                                                                                                                                                                                                                                                                       | 124 |

:

|       |                                                                                                                                                                                                                                                                                                                                                                                                                                                                                                                      |     |
|-------|----------------------------------------------------------------------------------------------------------------------------------------------------------------------------------------------------------------------------------------------------------------------------------------------------------------------------------------------------------------------------------------------------------------------------------------------------------------------------------------------------------------------|-----|
| TLR3  | TL <b>C183</b> DL <b>C189</b> SH <b>C183</b> NG <b>C189</b> LS <b>C183</b> ST <b>C189</b> KL <b>C183</b> GT <b>C189</b> Q <b>C183</b> V <b>C189</b> Q <b>C183</b> LEN <b>C189</b> L <b>C183</b> Q <b>C189</b> EL <b>C183</b> LL <b>C189</b> S <b>C183</b> NN <b>C189</b> K <b>C183</b> I <b>C189</b> Q <b>C183</b> AL <b>C189</b> K <b>C183</b> SE <b>C189</b> LD <b>C183</b> IF <b>C189</b> AN <b>C183</b> SS <b>C189</b> L <b>C183</b> KK <b>C189</b> LE <b>C183</b> SS <b>C189</b> N <b>C183</b> Q <b>C189</b> IK | 210 |
| TLR9  | HL <b>C183</b> SL <b>C189</b> K <b>C183</b> Y <b>C189</b> NN <b>C183</b> LT <b>C189</b> V <b>C183</b> VP---RN <b>C183</b> LP <b>C189</b> SS <b>C183</b> LE <b>C189</b> Y <b>C183</b> LL <b>C189</b> S <b>C183</b> Y <b>C189</b> NR <b>C183</b> IV <b>C189</b> KL <b>C183</b> AP <b>C189</b> ED <b>C183</b> LAN <b>C189</b> LT <b>C183</b> A---LR <b>C183</b> V <b>C189</b> LD <b>C183</b> V <b>C189</b> GG---                                                                                                        | 253 |
| TLR7  | VL <b>C183</b> SL <b>C189</b> K <b>C183</b> DN <b>C189</b> NV <b>C183</b> TA <b>C189</b> VP---TV <b>C183</b> LP <b>C189</b> ST <b>C183</b> LT <b>C189</b> E <b>C183</b> LY <b>C189</b> LN <b>C183</b> MI <b>C189</b> AK <b>C183</b> I <b>C189</b> Q <b>C183</b> ED <b>C189</b> DF <b>C183</b> NN <b>C189</b> LN <b>C183</b> Q---L <b>C183</b> Q <b>C189</b> ILD <b>C183</b> LS <b>C189</b> G---                                                                                                                      | 258 |
| TLR8  | LL <b>C183</b> SL <b>C189</b> S <b>C183</b> FN <b>C189</b> SL <b>C183</b> SH <b>C189</b> VP---PK <b>C183</b> LP <b>C189</b> SS <b>C183</b> LR <b>C189</b> K <b>C183</b> L <b>C189</b> F <b>C183</b> LS <b>C189</b> NT <b>C183</b> Q <b>C189</b> I <b>C183</b> K <b>C189</b> Y <b>C183</b> ISE <b>C189</b> ED <b>C183</b> FK <b>C189</b> GL <b>C183</b> IN---LT <b>C183</b> LL <b>C189</b> DL <b>C183</b> SG---                                                                                                       | 273 |
| TLR5  | RL <b>C183</b> DL <b>C189</b> SK <b>C183</b> N <b>C189</b> Q <b>C183</b> IR <b>C189</b> SL <b>C183</b> Y-----L <b>C183</b> HP <b>C189</b> S <b>C183</b> FG <b>C189</b> KL <b>C183</b> NS---L <b>C183</b> K <b>C189</b> S <b>C183</b> ID <b>C189</b> F <b>C183</b> SS <b>C189</b> N <b>C183</b> Q <b>C189</b> IF                                                                                                                                                                                                      | 183 |
| TLR4  | EL <b>C183</b> NV <b>C189</b> A <b>C183</b> HN <b>C189</b> L <b>C183</b> I <b>C189</b> Q <b>C183</b> S <b>C189</b> FK-----L <b>C183</b> PE <b>C189</b> Y <b>C183</b> FS <b>C189</b> N <b>C183</b> LT <b>C189</b> N---LE <b>C183</b> H <b>C189</b> LD <b>C183</b> LS <b>C189</b> SN---                                                                                                                                                                                                                                | 185 |
| TLR2  | FL <b>C183</b> N <b>C189</b> LL <b>C183</b> GN <b>C189</b> PY <b>C183</b> K <b>C189</b> T <b>C183</b> LG-----ET <b>C183</b> SL <b>C189</b> F <b>C183</b> SH <b>C189</b> L <b>C183</b> TK---L <b>C183</b> Q <b>C189</b> IL <b>C183</b> RV <b>C189</b> GN <b>C183</b> MD <b>C189</b> TF                                                                                                                                                                                                                                | 162 |
| TLR10 | YL <b>C183</b> DL <b>C189</b> S <b>C183</b> FN <b>C189</b> DF <b>C183</b> T <b>C183</b> MP-----IC <b>C183</b> EE <b>C189</b> AG <b>C183</b> N <b>C189</b> MS <b>C183</b> H---LE <b>C183</b> IL <b>C189</b> GL <b>C183</b> SGA---                                                                                                                                                                                                                                                                                     | 152 |
| TLR1  | HL <b>C183</b> DL <b>C189</b> S <b>C183</b> FN <b>C189</b> AF <b>C183</b> D <b>C183</b> AL <b>C189</b> P-----IC <b>C183</b> KE <b>C189</b> FG <b>C183</b> N <b>C189</b> MS <b>C183</b> Q---L <b>C183</b> K <b>C189</b> FL <b>C183</b> GL <b>C189</b> ST <b>C183</b> T---                                                                                                                                                                                                                                             | 149 |
| TLR6  | HL <b>C183</b> DL <b>C189</b> S <b>C183</b> FN <b>C189</b> DF <b>C183</b> K <b>C189</b> AL <b>C189</b> P-----IC <b>C183</b> KE <b>C189</b> FG <b>C183</b> N <b>C189</b> LS <b>C183</b> Q---LN <b>C183</b> FL <b>C189</b> GL <b>C183</b> SAM---                                                                                                                                                                                                                                                                       | 156 |

\* . : \* : \* : . .



TLR3 GLNEIGQELTG----QEWGRLENIFEIYLSYNKYLQLTRNSFALVPSLQRLMLRR----V 490  
 TLR9 SHNCISQAVNG----SQFLPLTGLQVLDLSDHNDLYHEHSFTELPRLEALDLSYNSQPF 559  
 TLR7 SGNLISQTLNG----SEFQPLAELRYLDFSNRDLHLHSTAFEELHKLEVLDISSNSHYF 580  
 TLR8 SANSNAQVLSG----TEFSAI PHVKYLDLTNNRDLDFDNASALTELSDLEVL DLSYNSHYF 586  
 TLR5 SYNLLGELYSS-----NFYGLPKVAYIDLQKNHIAI IQDQTFKFLEKLQTLDLRDNALTT 398  
 TLR4 SRNGLS---FKGCCSQSDFGTTSLKYL DLSFNGVIT--MSSNFLGLEQLEHLDFQHSNLKQ 436  
 TLR2 SENLMVEEYLNKNSACED-----AWPSLQTLILRQNHLS 401  
 TLR10 ANNILTDELFRKT---L-----QLPHLKTILNNGNKLET 386  
 TLR1 SNNLLTDTVFENC---G-----HLTELETILQMNQLKE 386  
 TLR6 TQNVFTDSIFEKC---S-----TLVKLETILQKNGLD 391  
 \* \* : \* :

TLR3 ALKNVDSSPSPFQPLRNLITL DLSNNNIANIN--DDMLEGLEKLEILDLQHNNLARLWKHA 549  
 TLR9 GMQGVGHNFVVAHLRTRLRHL SLAHNNIHSQ--VSQQLCSTSLRALDFSGNALGHMWAEG 617  
 TLR7 QSEGITHMLNFTKNLKV LQKLMNDNDISS--TSRTMESESLRTELEFRGNHLDVLRWREG 638  
 TLR8 RIAGVTHHLEFIQNF\*TNLKV LNLSHNNIYTLT--DKYNLESKSLVELVFSGNRLDILWDD 645  
 TLR5 I-HFIP SIP-----DIFLSGNKLVTPKINLTANLIHLSE---N-----R-L 435  
 TLR4 M-SE-----FSVFLSLRNLIYLDISH-----T-H 458  
 TLR2 L-EK-----TGET----- 408  
 TLR10 L-SL-----VSCF----- 393  
 TLR1 L-SK-----IAEM----- 393  
 TLR6 L-FK-----VGLM----- 398

TLR3 NPGGPYFLKGLSHLHILNLESNGFDEIPVEVFKDLF----- 586  
 TLR9 D--LYLHFFQGLSGLIWL DLSQNRLHTLLPQT\*LRNLPKSLQVLRRLRDNILA----FFKW 670  
 TLR7 DN-RYLQLFKNLLKLEELDISKNSLSFLPSGVDFGMPNPKNLSLAKNGLK----SFSW 692  
 TLR8 DN-RYISIFKGLKNLTRL DLSLNRLKHIPNEAFNLNPASLTE LHINDNMLK----FENW 699  
 TLR5 ENLDILYFLLRVP HLQILILNQRNFSSCSGDQTPSENPSLEQLFLGENMLQLAWETELCW 495  
 TLR4 TRVAFNGIFNGLSSEVLK MAGNSFQENFLPDIFTEL----- 495  
 TLR2 -----LLTKNLTNIDISKNSF--HSMPETCQWPEKMKYLNLSSTRI-----H 449  
 TLR10 -----ANN-TPLEHLDLSQNL LQ--HKNDENC SWPETVVMNLSYNKL-----SD 435  
 TLR1 -----TTQMSLQQLDISQNSVSYDEKKGDCSWTKSLLSLNMSNIL-----TD 437  
 TLR6 -----TKDMPSEILDVSWNSLESGRHKENCTWVESIVVLNLSNML-----TD 442  
 \* : : \* .

TLR3 ---<sup>C697</sup>ELKIIDLG-----<sup>C721</sup>-----LNNLNTLPASVFNNQVSLKS 614  
 TLR9 WSLHFL-PKLEVL DLAGNQLKALTNGSLFAGTRLRRLDVSCNSISFVAPGFFSKAKELRE 729  
 TLR7 KKLQCL-KNLETLDLSDHNLTTVPERLSNCSRS LKNLILKNNQIRSLTKYFLQDAFQLRY 751  
 TLR8 TLLQCF-PRLELLDLRGNKLLFLTDSLDF\*SSLR\*TL\*LLSHNRISHLPSGFLSEVSSLKH 758  
 TLR5 DVFEGL-SHLQVLYLNHNYLNSLPPGVFSELTALRGLSLNSNRLTVLSH--NDLPANLEI 552  
 TLR4 ----RNLTFLDLSQCQLEQLSPTAFNSLSSLQVLNMSHNNFFSLDTFPYKCLNSLQV 548  
 TLR2 SVTGCIPK\*TE\*ILDVSNNNLNLF-S---LNL PQLKELYISRNKMLTLPD--ASLLPMLLV 503  
 TLR10 SVFRC LPKSIQILD LNNNQIQTV-PKETIHLMALRELNI AFNFLTDLPG--CSHF SRLSV 492  
 TLR1 TIFRC LPPRIKVL DLHSNKIKSI-PKQVVKLEALQELNVAFNSLTDLPG--CGSFSSLSV 494  
 TLR6 SVFRC LPPRIKVL DLHSNKIKSV-PKQVVKLEALQELNVAFNSLTDLPG--CGSFSSLSV 499  
 : : : \* : : \*

TLR3 LNLQKNLITSVEKKVFGP-AFRNLTELD MRFNPFDC\*<sup>C787</sup>ESIAWFVNWINE-THTNIPELS 672  
 TLR9 LNL SANALKTV DHSWFGP-LASALQILDV SANPLH\*<sup>C789</sup>CACG-AAFMDFLLE--VQAAV PGLP 785  
 TLR7 LDLSSNKIQMIQKTSFPENVLNNLKM LLLHHRFL\*<sup>C787</sup>CCD-AVWFVWVNH-TEVTIPYLA 809  
 TLR8 LDLSSNLLKTINKSALETKT\*<sup>C789</sup>TKLSMLELHG NPF\*<sup>C787</sup>CCD-IGDFRRWMD EHLNVKIPR-L 816  
 TLR5 LDISRNQLLAPNP DVFV----SLSVLDITHNKFI\*<sup>C787</sup>CE-LSTFINWLNHT-NVTIAGPP 605  
 TLR4 LDYSLNHIMT\*<sup>C787</sup>SKQELQH-FPSSLAFNL\*<sup>C789</sup>TQNDFA\*<sup>C787</sup>CE-HQSFLQWIKDQRQLL--VEV 604  
 TLR2 LKISRNAIT\*<sup>C787</sup>FSKEQLDS-FH-TLKTLEAGGN\*<sup>C789</sup>FI\*<sup>C787</sup>CE-FLSFTQE-QQALAKVLIDWP 559  
 TLR10 LNIEMNFILSPSLDFVQS-CQ-EVKTLNAGRNPF\*<sup>C787</sup>CE-LKNFIQ-LETYSEVMMV GWS 548  
 TLR1 LIIDHNSVSHPSADFFQS-CQ-KMRSIKAGDNP\*<sup>C787</sup>CE-LGEFVKNIDQVSSEVLEGWP 551  
 TLR6 LIIDHNSVSHPSADFFQS-CQ-KMRSIKAGDNP\*<sup>C787</sup>CE-LREFVKNIDQVSSEVLEGWP 556  
 \* . \* : . . : : \* : \* .

C814 C833  
 TLR3 SHYLCNTPPHYHGFPVRLFDTS--SKDSAPFELFFMINTSILLIFIFIVLLIHFEGWRI 730  
 TLR9 SRVKCESPGQLQGLSIFAQDLR--LDLDEALSWDCFALSLLAVALGLGVPMLHHLGWDL 843  
 TLR7 TDVTCVGPGAHKGQSVISLDLY--TDELDTNLILFSLISISVSLFLMVMMTASHLYFWDV 867  
 TLR8 VDVICASPGDQRGKSIVSLELT--TCVSDVTAVILFFFTFFITTMVMLAALAHHLFYWDV 874  
 TLR5 ADIYCVYPDSFSGVSLFSL--TEGDEEEVLKSLKFSLFIVCT---VTLTLFLMTILTIV 660  
 TLR4 ERMECATPSDKQGMPVLSLNI---TDOMNKTIIGVSVLSVLVVS---VVAVLVYKFYFHL 658  
 TLR2 ANYLCDSPSHVRGQQVQDVRLSVSECHRTALVSGMCCALFLL-----ILLTGVLCHRFIG 614  
 TLR10 DSYTC EYPLNLRGTRLKDVHLHELSENTALLIVTIVVIMLVL-----GLAVAFCCLHFDL 603  
 TLR1 DSYKCDYPESYRGTLKDFHMSELSENTITLLIVTIVATMLVL-----AVTVTSLCIYLDL 606  
 TLR6 DSYKCDYPESYRGSPLKDFHMSELSENTITLLIVTIGATMLVL-----AVTVTSLCIYLDL 611  
 \* \* :

C874 C889 890  
 TLR3 SFYWNVSVHRVLGFKCID-R-----QTEQFEIYAAYIITHAYKD---KDWVWEHFSSMEKE 780  
 TLR9 WYCFHLC LAWL PWRGRQSGR-----DEDALPYDAFVVFDKTQSAVADWVYNELRGQLEE 897  
 TLR7 WYIYHECKAKIKGYQRLI-----SPDCYDAFIVYDTKDPAVTEWVLAELVAKLED 918  
 TLR8 WFIYNVCLAKVKGYRSL--S-----TSQTFYDAYISYDTKDASVTDWVINELRHLEE 925  
 TLR5 TKFERGECFICYKTAQRLVFKDHPQGTEPDMYKYDAYLCFSSKD---FTWVQNALLKHLDT 717  
 TLR4 ---MILAGCIKY--G-----RGENTYDAFVIYSSQD---EDWVRNELVKNLEE 698  
 TLR2 LWYMKMVAWLQA--KRPKAP---SRNTCYDAFVSYSERD---AYWVENIMVQELEEN 665  
 TLR10 PWYLRLMGQCTQT--WHIRVRKTTQEQLKRNVRTHAFISYSEHD---SLWVKNELIPNLEK 658  
 TLR1 PWYLRLVCQWTQT--RRRARNI PLEELQRNLDTTHAFISYSGHD---SFWMKNELLPNLEK 661  
 TLR6 PWYLRLVCQWTQT--RRRARNI PLEELQRNLDTTHAFISYSEHD---SAWVKSELVPYLEK 666  
 : \* : : : \* : :

C927  
 TLR3 ----DQSLKFCLEERDFEAGVFELEAIVN-SIKRSRKIFVITHHLLKDPICKRFKVHHA 835  
 TLR9 CR-GRWALRICLEERDWLPGKTLFENLWA-SVYGRKTLFVLAHTDRVSGLLR-ASFLLA 954  
 TLR7 PR-EK-HFNICLEERDWLPGQPVLENLSQ-SIQLSKKTVEFVMTDKYAKTENFK-IAFYLS 974  
 TLR8 SR-DK-NVLICLEERDWDPLAIDNLMQ-SINQSKKTVEFVLTKKYAKSWNEK-TAFYLA 981  
 TLR5 QYSDQNRFNICFEERDFVPGENRIANIQD-AIWNRSRKIVCLVSRHFLRDGWCL-EAFSYA 775  
 TLR4 G---VPPFQICLHYRDFIPGVAIAANIHEGFHKSRKVI VVVSQHFIQSRWCI-FEYELA 754  
 TLR2 F---NPPFKICLHKRDFIPGKWIIDNIID-SIEKSHKTVFVLSENFVKSEWCK-YELDFS 720  
 TLR10 E---DGSILICLYESYFDPGKSI SENIVS-FIEKSYKIFVLSPNFVQNEWCH-YEFYFA 713  
 TLR1 E---G--MQICLHERNFVPGKSI VENIIT-CIEKSYKIFVLSPNFVQSEWCH-YELYFA 714  
 TLR6 E---D--IQICLHERNFVPGKSI VENIIN-CIEKSYKIFVLSPNFVQSEWCH-YELYFA 719  
 : : : \* : : \* : : :

C1008 C1028  
 TLR3 VQQAIEQNLDSEIILVFLLEEIPDYKLNHALCLRRGMFKSHCILNWPVQKERIGAFRHKLQV 895  
 TLR9 QQRLLLEDKRDVVVLVILSPD--GRRSRYVRLRQLC-RQSVLLWPHQPSGQRSFWADLGM 1011  
 TLR7 HQRLMDEKVDVILIFLEKP--FQKSKFLQLRKRLC-GSSVLEWPTNPQAHYPFWQCLKN 1031  
 TLR8 LQRLMDENMDVILIFILLEPV--LQHSQYLRLRQLC-KSSILQWPDNPKAEGFLWQTLRN 1038  
 TLR5 QGRCLSDLNALIMVVVGSLSQYQLMKH-QSIRGFVQKQYLRWPEDLQDVGWFLHKLKLSQ 834  
 TLR4 QTWQFLSSRAGIIFIVLQKVEKTLRQ--VELYRLLSRNTYLEWEDSVLGRHIFWRRLRK 813  
 TLR2 HFRLEFDENNDAAIILILEPIEKKAIPQRFCKLRKIMNTKTYLEWPMDEAQREGFWVNLRA 780  
 TLR10 HHNLFHENS DHIILILEPIPFYCIPTRYHKLKALLEKKAYLEWPKDRRCGLFWANLRA 773  
 TLR1 HHNLFHEGSNLIILILEPIPQYSIPSSYHKLKSLMARRTYLEWPKEKSKRGLFWANLRA 774  
 TLR6 HHNLFHEGSNLIILILEPIPQNSIPNKYHKLKALMTQRTYLQWPKEKSKRGLFWANLRA 779  
 : . : : : : \* \* . \* :

TLR3 ALGSKNSVH----- 904  
 TLR9 ALTRDNHHFYNRNFCQGPTAE----- 1032  
 TLR7 ALATDNHVAYSQVFKETV----- 1049  
 TLR8 VVLTEENDSRYNMYVDSIKQY----- 1059  
 TLR5 QILKKEKEKKKDNNIPLQT-----VATIS----- 858  
 TLR4 ALLDGKSWNPEGTV-GTGCNWQE---ATSI----- 839  
 TLR2 AIKS----- 784  
 TLR10 AINVNVLATREMYELQTFTELNEESRGS'TISLMRTDCL 811  
 TLR1 AINIKLTEQAKK----- 786  
 TLR6 AFNMKLTLVTENNDVKS----- 796

**Supplementary Figure 9 Multiple sequence alignment analysis demonstrating the position of all cysteine residues on human TLR7.** Individual sequences of human TLRs were obtained from NCBI GenBank protein databases with the following accession numbers TLR1 (CAG38593.1), TLR2 (AAH33756.1), TLR3 (ABC86910.1), TLR4 (AAF07823.1), TLR5 (AAI09119.1), TLR6 (BAA78631.1), TLR7 (AAZ99026.1), TLR8 (AAZ95441.1), TLR9 (AAZ95520.1) and TLR10 (AAY78491.1) and then sequence alignment was performed with CLUSTAL OMEGA (EMBL-EBI). Shown in red dotted rectangular boxes are the cysteines on human TLR7 and the respective position indicated.

C36

```

[Salmo       MLSRMT-----RSECASFHVCGVILLGLWCSSVLAAGSWYPKTLPCDVTLDSDNTMNVN  54
[Xenopus     MHGKTFKV-----FYFGMRRQLLFFLISLSLSFSGLLATNWFPKSLPCDVEQNAKGNVIVV  55
[Gallus      -MTNLSEVAHRKMVHHARTSNALLFVLLFLFPMLLSGRWFPKTLPCDVEA--FESTVRV  57
[Mus         -----MV---FPMWTRKRQILILFLNMILLVSRVFGFRWFPKTLPCDVKVNIPEAHVIV  49
[Rattus      -----MV---FPMWTLKRQSFIFLNMILLVSRVLGFRWYFPKTLPCDVSLDSTNTHVIV  49
[Homo        -----MV---FPMWTLKRLLILILFNIILISKLLGARWFPKTLPCDVTLDVDPKNHVIV  49
[Sus         -----MV---FPVWTLKRQFLILFNIILISELLGARWFPKTLPCDVSLDAPNAHVIV  49
[Bos         -MGDLFLYFQV--FPMWTLKRQFPILFNMILLSGLLGARWFPKTLPCDVTLDAPNTHVIV  57
                : : : : : *-*:*:*  :  :  *

```

C51                      C98 C100

```

[Salmo       ICFERGLLEVPKDI PRNTTNLTLTINHIPHINSTSFQGLENLTEIDMRCVIVPIKIGPKD  114
[Xenopus     ICFDRHLTSPWGIPTNVTNLTTLTINHIPRISVDSFAEFTNLVELDFRCVIVPAKVGPKD  115
[Gallus      ICFDRRLKEVPRGIPGNATNLTTLTINHIPRISPASFTQLENLVEIDFRCVIVPRRLGPKD  117
[Mus         ICFDKHLTEIPEGIPNTTNTNLTLTINHIPSISPD SFRLNHLEELDLRCVIVPVLLGSKA  109
[Rattus      ICFDKHLTEIPEGIPNTTNTNLTLTINHIPSISPD SFHRLKHLEELDLRCVIVPILLGSKA  109
[Homo        ICFDKHLTEIPGGIPNTTNTNLTLTINHIPDISPASFHRLDHLVEIDFRCVIVPLGSKN  109
[Sus         ICFDKHLTAIPGGIPNATNLTTLTINHIASITPASFQQLDHLVEIDFRCVIVPVLGPKD  109
[Bos         ICFDKHLTEIPGGIPANATNLTTLTINHIIAGISPASFHRLDHLVEIDFRCVIVPVLGPKD  117
                * * * * * : * * * * * : * * * * * : * * * * *

```

C112                      C183                      C189

```

[Salmo       RMCVTESVTIKTNTFKDLRNLKALYLDGNQLSSIPKGLPPNLIILLSEVNKIYTI LKRNL  174
[Xenopus     HVCVTKRLDVEDRSFASLYNLRSLYLDGNQLIEFPGKGLPPNLQLLSEINNIISISRNNLS  175
[Gallus      NVCVTPPSIENG SFAALTRLKSLYLDANQLSKIPRGLPATLRLLSLEANNIFSIKKNTF  177
[Mus         NVCVTKRLQIRPGSF SGLSDLKALYLDGNQLLEIPQDL PSSLHLLSLEANNIFSIKKN  169
[Rattus      NVCVTKRLQIRPGSF SGLSDLKSLYLDGNQLLEIPQDL PSSLQLL SLEANNIFSIKKN  169
[Homo        NMCVTKRLQIKRFSF SGLTYLKSLEYLDGNQLLEIPQGL PPSLQLL SLEANNIFSIRK  169
[Sus         NICVTKRRLQIKPSSF SKLTYLKALYLDGNQLLEIPRDL PPSLQLL SLEANNIFWIM  169
[Bos         NVCVTKRLQIKPNSF SKLTYLKSLEYLDGNQLLEIPQDL PPSLQLL SLEANNIFLI  177
                : * : * : * : * : * * * * * : * : * : * : * : * * * * *

```

C260 C263                      C270 C273

```

[Salmo       LYLYNNKIEMVTDKDFHNLTLQLEILDLCGNCPHCYNAPFFCTEC PNN-SLQIDPSTFK  293
[Xenopus     LYLYNNAIQYIEEHDLNLINLEILDLSGNCPHCYNSPFFCTEC PNNAPIQIHPKAFSS  295
[Gallus      LYLYNNRIQEVQEHDLSNLYNLEILDLSGNCPHCYNAPYFCCTEC PNI-SIKIHSKA  296
[Mus         LYLYNNI I KKI QENDFN NLNQLVLDLSGNCPHCYNVPYFCCTEC ENNSPLQIHD  289
[Rattus      LYLYNNI I KRI QEHDFNKLSQLQVLDLSGNCPHCYNVPYFCCTEC ENNSPLQIHD  289
[Homo        LYLYNNMI AKIQEDDFN NLNQLVLDLSGNCPHCYNAPFFCAFC KNSPLQIPVNA  289
[Sus         LFLYNNI I AKIQEDDFN NLSQLQVLDLSGNCPHCYNVPFFCTEC ENNAPLQIHL  289
[Bos         LYLYNNI I TKIQEDDFN NLSQLQVLDLSGNCPHCYNVPFFCTEC ENNSPLQIDP  297
                * * : * * * : * * : * * : * * : * * : * * : * * : * * : *

```

```

[Salmo       TKLRI LRLHSNSLTYVLRWFQNCLELRVLDLSTNFLAREIATYFPRALPNLEELDLSF  353
[Xenopus     KNLQVLR LRLHSNSLR S IPEQWFKNRNLQVLDLSENFLASE I STANFLKYI PSLK  355
[Gallus      KKLRI LRLHSNSLQS I PSSWFKNIKLNLDLSQNF LIKEIGDAEFLKLI PSLVEL  356
[Mus         TELKVLRLHSNSLQHVPPTWFKNMNRNLQELDLSQNYLAREIEEAKFLHFLPNLV  349
[Rattus      TELKVLRLHSNSLQHVPAEWFKNMNSLQELDLSQNYLAREIEEAKFLNSLPNLV  349
[Homo        TELKVLRLHSNSLQHVP PRWFKNINKLQELDLSQNF LAKEIGDAKFLHFLPSLI  349
[Sus         TELQVLR LRLHSNSLQYVPRWFQNLNKLKELDLSQNF LAKEIGDAKFLHLLPNL  349
[Bos         TELQVLR LRLHSNSLQHVPRWFKNINKLKELDLSQNF LAKEIGDAKFLHLLHNL  357
                : * : * * * * * : * * : * : * * * * * : * * : * : * *

```

```

[Salmo       NYELQRYPATLHLSPSFSSLSKSLKVLRI RAFV FQQLTLEDISPLIHLKNLEVIDL  413
[Xenopus     NFELQVYPSDLKLSIFSSLASLETLRIRGYVFQNLKKNMPLVHLPNLTL DLLST  415
[Gallus      NFELQMYPFLNLSKTFSCLSNLET LRIGYVFKELREENLDPLNLRNLTVL DLG  416
[Mus         NYELQVYHAST I LPHSLSSLENLKLIRVKG YVFKELKNS SLSVLHKLPRLE  409
[Rattus      NYELQVYHAST I LPHSLSSLT KLKNLYIKGYVFKELK DSSLSVLHNSNLE  409
[Homo        NFELQVYRASMNLSQAFSSLSKSLKILRIRGYVFKELKSFNLSPLHNLQNLE  409
[Sus         NYELQVYHTFMNLSDSFSSLSKSLKILRIRGYVFKELKSNLNSPLRNLPNLE  409
[Bos         NYDLQVYHAVINLSDAFSSLSKSLKILRIRGYVFKELKSNLNSPLHNLPNLE  417
                * * : * * * : * * : * * : * * : * * : * * : * * : *

```

[Salmo K I T N L S I L M E L K S F K I I N L S D N K I S S P S E S G Q S V A F S G G E A I H G S P M S D A G H N R N G E V R E 473  
[Xenopus K V A D F S L F P K F K S L Q T I I L S N N K I S P S S E A -- N I D S C S A S Q V ----- S S G H Y I G R T F Q E 467  
[Gallus K I A D L R V F K F K F E N L K I I D L S M N K I S P S S G S E G N F Y G F C S D H R I ----- T V E Q Y S R H V L Q E 470  
[Mus K I A D L N I F K H F E N L K I I D L S V N K I S P S -- E E S R E V G L C T N A Q T ----- S V D R H G P Q V L E A 462  
[Rattus K I A D L N I F Q Q F E N L K F I D L S V N K I S P S -- E E S R E V G L C T N A Q T ----- S V D W H G P Q V L E A 462  
[Homo K I A N L S M F K Q F K R L K V I D L S V N K I S P S -- G D S S E V G F C S N A R T ----- S V E S Y E P Q V L E Q 462  
[Sus K I A N L S I F K Q F K T L K F I D L S V N K I S P S -- G D S S E S G F C S G M R T ----- S A E S H G P Q V L E S 462  
[Bos K I A N L S I F N Q F K T L K F I D L S V N K I S P S -- G D S P E G G F C S N R R T ----- S V E G H G P Q V L E T 470  
\* :::: : : . \* \* \* \* \* \* ..

[Salmo I H Y F R Y D E Y A R S C R F K N K E D G T L N S F V N T Q C S K F G K T L D I S R N N I F F L H S -- R F L N L A D L R 532  
[Xenopus V H Y F E Y D E N A R K C K A K D K E N F T F K L F L N E S C Q A Y G Q S L D L S Q N N I F F V K A T D F T N L S F L K 527  
[Gallus M H Y F R Y D E Y G R S C R S K D K E A D S Y Q P L V N G D C M S Y G E T L D L S R N N I F F V N S I D F Q D L S F L K 530  
[Mus L H Y F R Y D E Y A R S C R F K N K E P P S F L P L -- N A D C H I Y G Q T L D L S R N N I F F I K P S D F Q H L S F L K 521  
[Rattus L H Y F R Y D E Y A R S C R F K N K E P P T F L P L -- N A D C H I Y G K T L D L S R N N I F F I K P S D F K H L S F L K 521  
[Homo L H Y F R Y D K Y A R S C R F K N K E A -- S F M S V -- N E S C Y K Y G Q T L D L S K N S I F F V K S S D F Q H L S F L K 520  
[Sus L H Y F R Y D E Y A R S C R F K N K E P S S L P L -- N E D C S M Y G Q T L D L S R N N I F F I R S S E F Q H L T F L K 521  
[Bos L H Y F R Y D E Y A R S C R S K S K E P P S F L P L -- N E D C M Y G Q T L D L S R N N I F F I K P S D F Q H L S F L K 529  
\* \* \* \* \* \* : \* \* \* \* \* : \* \* \* \* \* \* : \* \* \* \* \* : \* \* \* \* \* \* : \* \* \* \* \* \*

[Salmo C L N L S G N A M S Q S L N G S E F T F L T K L Q Y L D F S F N R L D L L Y S S A F Q E L E N L V I L D I S N N N H Y F 592  
[Xenopus C L N L S G N A I S Q T L N G S E F R N L N R L K Y L D F S N N R I D L L Y S T A F Q E L T E L E V L D I S N N D H Y F 587  
[Gallus C L N L S G N A I S Q T L N G S E F Y Y L S G L K Y L D F S N N R I D L L Y S T A F K E L K F L E I L D L S N N K H Y F 590  
[Mus C L N L S G N T I G Q T L N G S E L W P L R E L R Y L D F S N N R L D L L Y S T A F E E L Q S L E V L D L S S N S H Y F 581  
[Rattus C L N L S G N A I G Q T L N G S E L Q P L R E L R Y L D F S N N R L D L L Y S T A F E E L Q N L E I L D L S S N S H Y F 581  
[Homo C L N L S G N L I S Q T L N G S E F Q P L A E L R Y L D F S N N R L D L L H S T A F E E L H K L E V L D I S S N S H Y F 580  
[Sus C L N L S G N S I S Q A L N G S E F Q P L V E L K Y L D F S N N R L D L L H S T A F E E L R N L E V L D I S S N S H Y F 581  
[Bos C L N L S G N S I S Q T L N G S E F Q P L V E L K Y L D F S N N R L D L L Y S T A F E E L H N L E V L D I S S N S H Y F 589  
\* \* \* \* \* \* : \* \* \* \* \* \* : \* \* \* \* \* \* : \* \* \* \* \* \* : \* \* \* \* \* \* : \* \* \* \* \* \*

[Salmo E S E G L T H M L N F T K N L T K L K I L L M N Y N K I S T S T N T E L E S R S L E K L E F K G N R L D M L W R D G D T 652  
[Xenopus L A E G I T H V F N F T K N L E K L T K L M M N N Q I S T S T N R H L V S Q S L R I L E F K G N Y L N I L W K D G D T 647  
[Gallus L A E G V S H V L S F M K N L A Y L K K L M M N E I S T S I S T G M E S Q S L Q T L E F R G N R L D I F W S D G K K 650  
[Mus Q A E G I T H M L N F T K K L R L L D K L M M N D I S T S A S R T M E S D S L R I L E F R G N H L D V L W R A G D N 641  
[Rattus Q A E G I T H M L N F T K K L R H L E K L M M N D I S T S A S R T M E S E S L R V L E F R G N H L D V L W R D G D N 641  
[Homo Q S E G I T H M L N F T K N L K V L Q K L M M N D I S S T S R T M E S E S L R T L E F R G N H L D V L W R E G D N 640  
[Sus Q S E G I T H M L D F T K N L K V L K K L M M N D I A T S T S T M E S E S L R I L E F R G N H L D I L W R D G D N 641  
[Bos Q S E G I T H M L N F T K N L K V L R K L M M N Y N D I A T S T S R T M E S E S L Q I L E F R G N H L D I L W R D G D N 649  
\* \* \* \* \* \* : \* \* \* \* \* \* : \* \* \* \* \* \* : \* \* \* \* \* \* : \* \* \* \* \* \* : \* \* \* \* \* \*

[Salmo R Y I D Y F K K L L N L R V L D I S H N N L N F I P Q Q V F Q G L P D K L T N L Y I N N N R L K I F S W E K L I I Q Y 712  
[Xenopus R Y L N F F K N L N K Y K L D I S E N S L T F V P P G V F E G M P P D L L E Y L A R N K L K T F S W D K L H I E K 707  
[Gallus E Y L S F F K N L T N L E Q L D I S S N M L N F L P P D V F E A M P P E L K I L N L T S N R L H T F N W G K L H I T K 710  
[Mus R Y L D F F K N L F N L E V L D I S R N S L N S L P P E V F E G M P P N L K N L S L A K N G L K S F F W D R L Q I T K H 701  
[Rattus R Y L D F F K N L L N L E E L D I S R N S L N S V P P G V F E G M P P N L T T L S L A K N G L R S F S W G R L Q I T K H 701  
[Homo R Y L Q L F K N L L K L E E L D I S K N S L S F L P S G V F D G M P P N L K N L S L A K N G L K S F S W K K L Q I T K N 700  
[Sus R Y L K F F K N L H K L E E L D I S E N S L S F L P S G V F D G M P P N L K T L S L A K N G L K S F N W G K L Q I T Q N 701  
[Bos R Y L K F F K N L L N L E E L D I S E N S L S F L P L G V F D S M P P N L K T L S L A K N G L K S F S W E R L Q I T K N 709  
\* \* \* \* \* \* : \* \* \* \* \* \* : \* \* \* \* \* \* : \* \* \* \* \* \* : \* \* \* \* \* \*

[Salmo L E V L D L S S N S I S T V P P E L S N C T K S L K T L L L R R N Q I S K L S A Y F L K D A F S L K Y L D L S F N H I Q 772  
[Xenopus L S V L D L S N N Y L T T V P R L S N C T S S I K K L I L S N N K I K K L T P F F L R G S V S L K Y L D L S D N L I Q 767  
[Gallus L I T L D L S N N L T T V P R L S N C T S T L Q E L I L R N N R I T R I T K Y F L R G A I Q L T Y L D L S S N K I Q 770  
[Mus L E I L D L S H N Q L T K V P E R L A N C S K S L T T L I L K H N Q I R Q L T K Y F L E D A L Q L R Y L D I S S N K I Q 761  
[Rattus L K N L D L S H N Q L T T V P A R L A N C S K S L T K L I L N H N Q I R Q L T K Y F L E D A L Q L R Y L D I S S N K I Q 761  
[Homo L E T L D L S H N Q L T T V P E R L S N C S R S L K N I L K N N Q I R S L T K Y F L Q D A F Q L R H L D L S S N K I Q 760  
[Sus L E T L D L S Y N Q L K T V P E R L S N C S R S L K K L I L K N N E I R N L T K Y F L Q D A F Q L R H L D L S S N K I Q 761  
[Bos L E T L D L S F N Q L K T V P E R L S N C S R S L K K L I L K N N Q I R C L T K Y F L Q G A F Q L R H L D L S S N K I Q 769  
\* \* \* \* \* \* : \* \* \* \* \* \* : \* \* \* \* \* \* : \* \* \* \* \* \* : \* \* \* \* \* \*

[Salmo N I E Q T S I P D D V D V Q M D T L V L N N N K F M C T C L A L M F V M W L N R T M V N I P R L A T A V V C A A P G A Q 832  
[Xenopus N I G H S S F P E D V L D N L T E L L Q G N P F K C L E N L W L V S W I N Q T K V Y I P N L V T G V T C S G P G A H 827  
[Gallus I I K K S S F P E N I I N N L R M L L H N N P F K C C I A V W F V G W I N Q T Q V A I P L L A T D V T C A G P G A H 830  
[Mus V I Q K T S F P E N V L N L E M L V L H H N R F L C C I A V W F V W W V N H T D V T I P Y L A T D V T C G P G A H 821  
[Rattus V I Q K T S F P E N V L N N L M L L L H H N R F L C C I A V W F V W W V N H T D V T I P Y L A T D V T C A G P G A H 821  
[Homo M I Q K T S F P E N V L N N L K M L L L H H N R F L C C I A V W F V W W V N H T E V T I P Y L A T D V T C G P G A H 820  
[Sus V I Q K T S F P E N V L N N L Q I L F L H H N R F L C C I A V W L V W W V N H T E V T I P F L A T D V T C M G P G A H 821  
[Bos V I Q K T S F P E N V L N N L I L F L H H N R F L C C I A V W F V W W V N H T E V T I P Y L A T D V T C M G P G A H 829  
\* \* \* \* \* \* : \* \* \* \* \* \* : \* \* \* \* \* \* : \* \* \* \* \* \* : \* \* \* \* \* \*



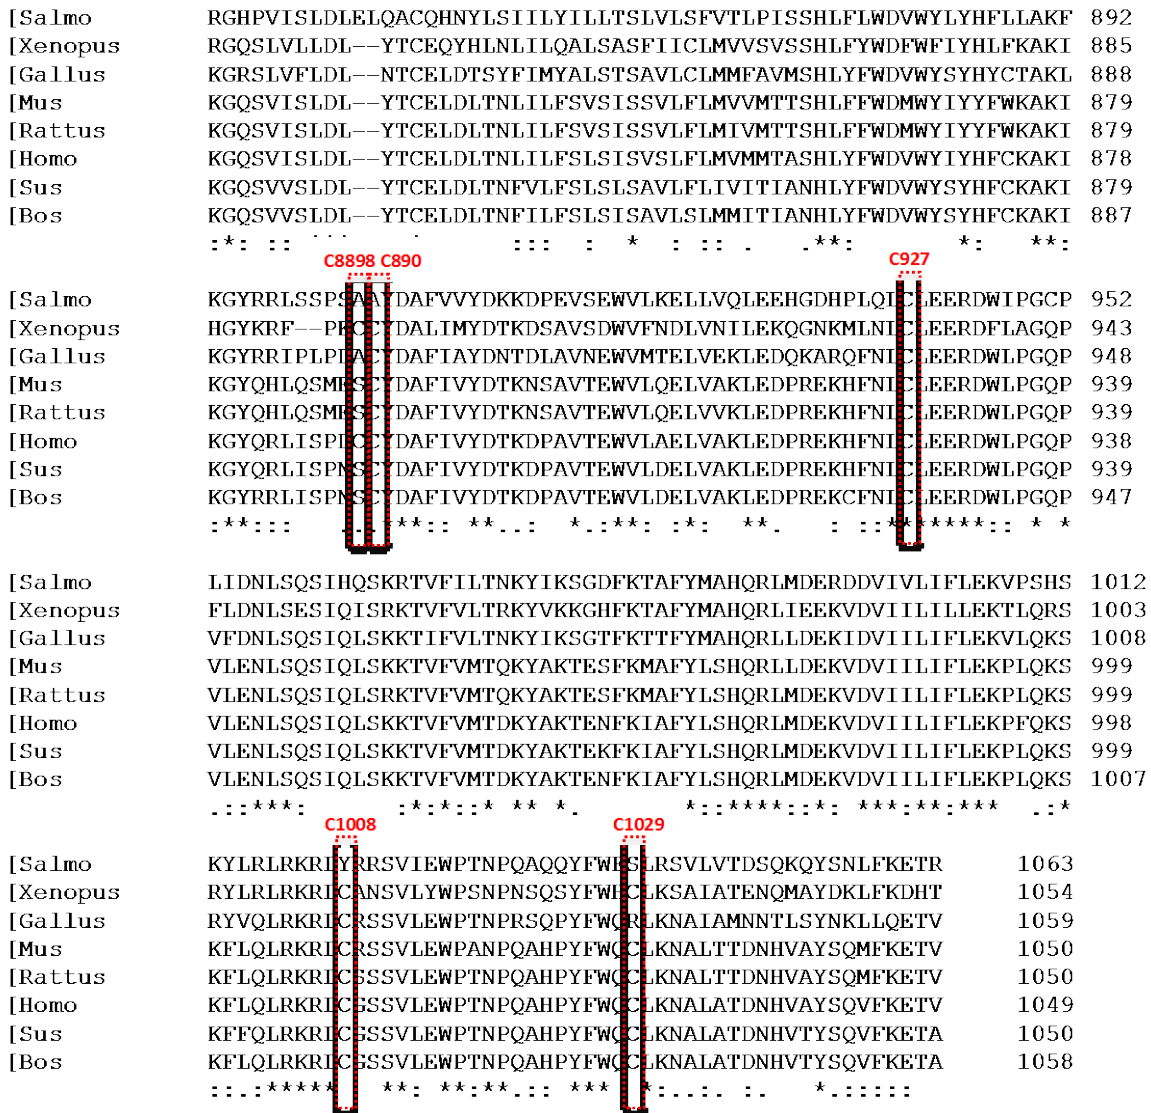

**Supplementary Figure 10. Multiple sequence alignment analysis of vertebrate TLR7.** Individual sequences of TLRs were obtained from NCBI GenBank protein databases with the following accession numbers *Salmo salar* (CCX35457.1), *Xenopus tropicalis* (AAI66280.1), *Gallus gallus* (ACR26243.1), *Mus musculus* (AAI32386.1), *Rattus norvegicus* (NP\_001091051.1), *Homo sapiens* (AAZ99026.1), *Sus scrofa* (ABQ52583.1) and *Bos taurus* (NP\_001028933.1) and then sequence alignment was performed with CLUSTAL OMEGA (EMBL-EBI). Shown in red dotted rectangular boxes are the cysteines on human TLR7 and the respective position indicated.

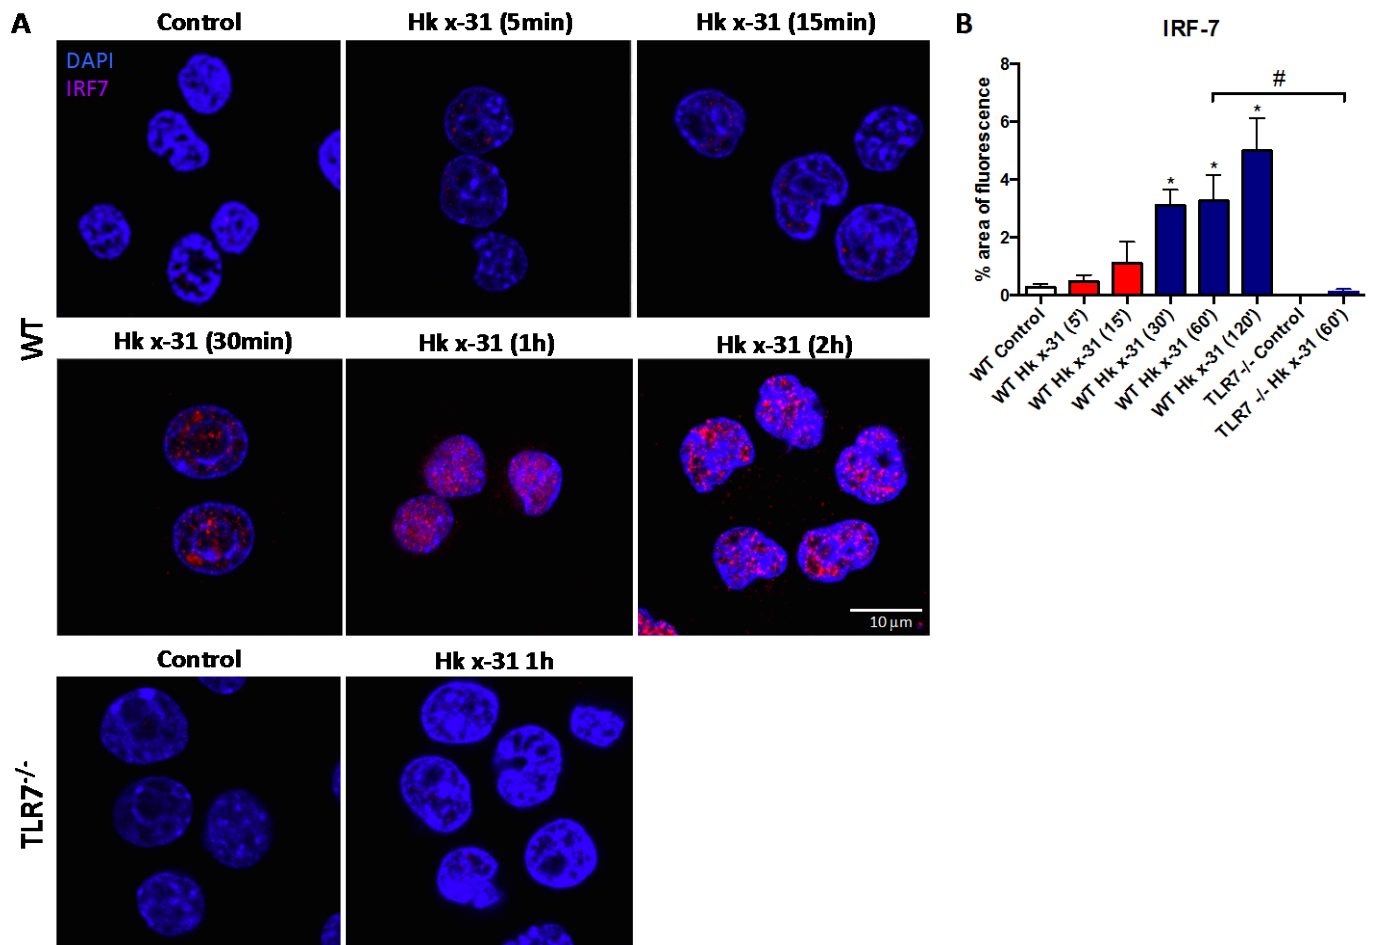

**Supplementary Figure 11. Influenza A virus causes interferon regulatory factor 7 (IRF-7) nuclear translocation via a TLR7-dependent mechanism.**

**(A)** Immortalized bone marrow macrophages from WT or TLR7<sup>-/-</sup> mice were either left untreated or infected with HKx31 influenza A virus (HKx31, MOI of 10) for various times as indicated and then labeled with the IRF-7 antibody and 4',6'-diamidino-2-phenylindole (DAPI). Images are representative of >100 cells analyzed over 4 separate experiments. Original magnification X100. All data are represented as mean ± SEM. One-way ANOVA followed by Dunnett's *post hoc* test for multiple comparisons. \*P<0.05 compared to WT controls. #P<0.05 - comparison indicated by horizontal bar.

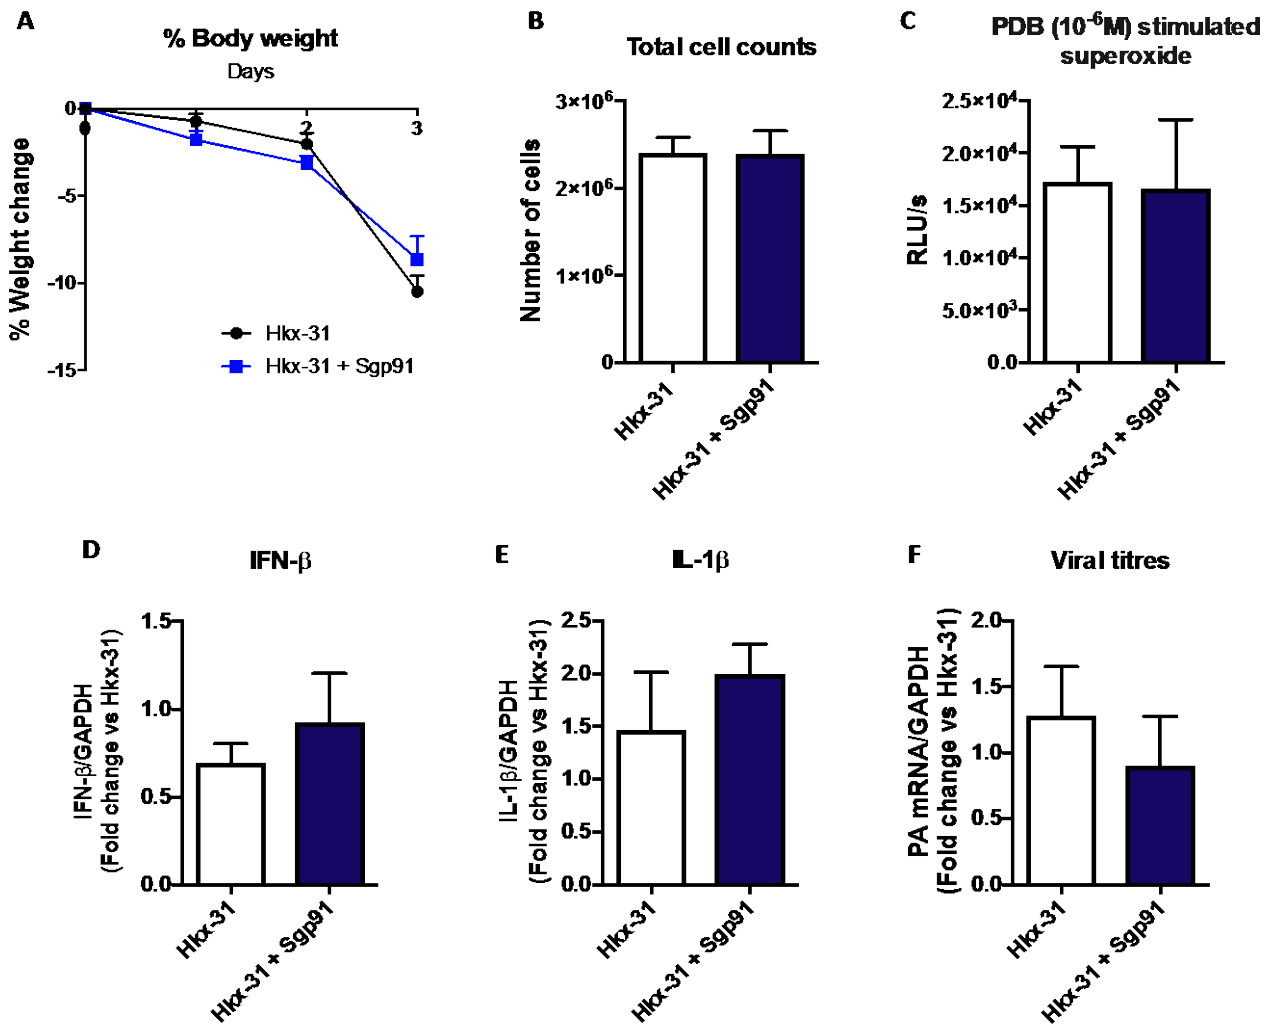

**Supplementary Figure 12. Scrambled cholesterol-conjugated gp91ds-TAT failed to influence influenza A virus dependent pathology in vivo.**

Scrambled gp91ds-TAT (Sgp91; 0.02mg/kg/day) was delivered intranasally to WT mice once daily for 4 days. At 24h after the first dose of inhibitor, mice were infected with HKx31 influenza A virus ( $1 \times 10^5$  PFU per mouse). Mice were culled at day 3 post-infection and (A) body weight, (B) airway inflammation was assessed by BALF cell counts, (C) superoxide was measured from BALF inflammatory cells via L-O12 (100 $\mu$ M)-enhanced chemiluminescence, (D and E) lung IFN- $\beta$  and IL-1 $\beta$  mRNA, respectively, was determined by QPCR and (F) viral load was determined by QPCR. All data are represented as mean  $\pm$  SEM, n=8.

| TLR7-H                    | C36 | C51 | C98 | C100 | C112 | C183 | C189 | C260 | C263 | C270 | C273 | C445 | C475 | C491 | C521 | C697 | C721 | C787 | C789 | C814 | C833 | C874 | C889 | C890 | C927 | C1008 | C1028 | Accession |            |
|---------------------------|-----|-----|-----|------|------|------|------|------|------|------|------|------|------|------|------|------|------|------|------|------|------|------|------|------|------|-------|-------|-----------|------------|
| TLR1-H                    | -   | -   | -   | -    | -    | -    | -    | -    | -    | -    | -    | -    | -    | -    | -    | -    | Yes  | Yes  | Yes  | Yes  | -    | Yes  | -    | -    | Yes  | -     | -     | CA68101.1 |            |
| TLR2-H                    | -   | -   | -   | -    | -    | -    | -    | -    | -    | -    | -    | -    | -    | -    | -    | Yes  | -    | Yes  | Yes  | Yes  | -    | -    | -    | Yes  | Yes  | -     | -     | AA03796.1 |            |
| TLR3-H                    | -   | -   | -   | -    | -    | -    | -    | -    | Yes  | -    | -    | -    | -    | -    | -    | -    | -    | Yes  | Yes  | Yes  | Yes  | -    | -    | -    | Yes  | -     | -     | AA03803.1 |            |
| TLR4-H                    | -   | -   | -   | -    | -    | -    | -    | -    | Yes  | -    | -    | -    | Yes  | -    | Yes  | -    | -    | Yes  | Yes  | Yes  | Yes  | -    | -    | -    | Yes  | -     | -     | AA07029.1 |            |
| TLR5-H                    | -   | -   | -   | -    | -    | -    | -    | -    | -    | -    | -    | -    | -    | -    | -    | -    | -    | Yes  | Yes  | Yes  | Yes  | Yes  | -    | -    | Yes  | -     | -     | AA08113.1 |            |
| TLR6-H                    | -   | -   | -   | -    | -    | -    | -    | -    | -    | -    | -    | -    | -    | -    | -    | -    | Yes  | Yes  | Yes  | Yes  | -    | Yes  | -    | -    | Yes  | -     | -     | BA07681.1 |            |
| TLR8-H                    | Yes | Yes | -   | -    | -    | Yes  | Yes  | Yes  | Yes  | Yes  | Yes  | -    | -    | Yes  | Yes  | -    | -    | Yes  | Yes  | Yes  | Yes  | Yes  | -    | -    | Yes  | Yes   | -     | AA02946.1 |            |
| TLR9-H                    | Yes | Yes | -   | Yes  | Yes  | Yes  | Yes  | Yes  | Yes  | Yes  | Yes  | -    | -    | Yes  | Yes  | -    | -    | Yes  | Yes  | Yes  | Yes  | Yes  | -    | -    | Yes  | Yes   | -     | AA03520.1 |            |
| TLR10-H                   | -   | -   | -   | -    | -    | -    | -    | -    | -    | -    | -    | -    | -    | -    | -    | Yes  | -    | Yes  | Yes  | Yes  | Yes  | -    | -    | -    | Yes  | -     | -     | AA07540.1 |            |
| TLR7<br><i>Mus</i>        | Yes | Yes | Yes | Yes  | Yes  | Yes  | Yes  | Yes  | Yes  | Yes  | Yes  | Yes  | Yes  | Yes  | Yes  | -    | Yes  | Yes  | Yes  | Yes  | Yes  | Yes  | -    | -    | Yes  | Yes   | Yes   | Yes       | AA02384.1  |
| TLR7<br><i>rattus</i>     | Yes | Yes | Yes | Yes  | Yes  | Yes  | Yes  | Yes  | Yes  | Yes  | Yes  | Yes  | Yes  | Yes  | Yes  | -    | Yes  | Yes  | Yes  | Yes  | Yes  | Yes  | -    | -    | Yes  | Yes   | Yes   | Yes       | AF050920.1 |
| TLR7<br><i>Sus</i>        | Yes | Yes | Yes | Yes  | Yes  | Yes  | Yes  | Yes  | Yes  | Yes  | Yes  | Yes  | Yes  | Yes  | Yes  | -    | Yes  | Yes  | Yes  | Yes  | Yes  | Yes  | -    | Yes  | Yes  | Yes   | Yes   | Yes       | AA02283.1  |
| TLR7<br><i>Bos taurus</i> | Yes | Yes | Yes | Yes  | Yes  | Yes  | Yes  | Yes  | Yes  | Yes  | Yes  | Yes  | Yes  | Yes  | Yes  | -    | Yes  | Yes  | Yes  | Yes  | Yes  | Yes  | -    | Yes  | Yes  | Yes   | Yes   | Yes       | AF050920.1 |
| TLR7<br><i>Xenopus</i>    | Yes | Yes | Yes | Yes  | Yes  | Yes  | Yes  | Yes  | Yes  | Yes  | Yes  | Yes  | Yes  | Yes  | Yes  | -    | Yes  | Yes  | Yes  | Yes  | Yes  | Yes  | -    | Yes  | Yes  | Yes   | Yes   | Yes       | AA02283.1  |
| TLR7<br><i>Gallus</i>     | Yes | Yes | Yes | Yes  | Yes  | Yes  | Yes  | Yes  | Yes  | Yes  | Yes  | Yes  | Yes  | Yes  | Yes  | -    | Yes  | Yes  | Yes  | Yes  | Yes  | Yes  | -    | Yes  | Yes  | Yes   | -     | -         | AA02283.1  |
| TLR7<br><i>Salmo</i>      | Yes | Yes | Yes | Yes  | Yes  | Yes  | Yes  | Yes  | Yes  | Yes  | Yes  | -    | Yes  | Yes  | Yes  | -    | Yes  | Yes  | Yes  | Yes  | Yes  | Yes  | -    | -    | -    | Yes   | -     | -         | CG38461.1  |

**Supplementary Table 1. Pairwise sequence alignment analysis of human TLR7 vs other members of the human TLR family and vs vertebrate TLR7.** Individual sequences of TLRs were obtained from NCBI GenBank protein databases with the indicated accession numbers and then sequence alignment was performed with Pubmed NCBI BLAST.

| Gene                                              | Company            | Gene expression assay                 | Catalog no. | Ref Seq        |
|---------------------------------------------------|--------------------|---------------------------------------|-------------|----------------|
| <b>Mouse IL-1<math>\beta</math> TaqMan Primer</b> | Applied Biosystems | Mm00434228_m1                         | 4331182     | NM_008361.3    |
| <b>Mouse CYBB TaqMan Primer</b>                   | Applied Biosystems | Mm01287743_m1                         | 4331182     | NM_007807.5    |
| <b>Mouse IFNB1 TaqMan Primer</b>                  | Applied Biosystems | Mm00439552_s1                         | 4331182     | NM_010510.1    |
| <b>Mouse TNF<math>\alpha</math> TaqMan Primer</b> | Applied Biosystems | Mm00443258_m1                         | 4331182     | NM_001278601.1 |
| <b>Mouse IL6 TaqMan Primer</b>                    | Applied Biosystems | Mm00446190_m1                         | 4331182     | NM_031168.1    |
| <b>Mouse TLR7 TaqMan Primer</b>                   | Applied Biosystems | Mm00446590_m1                         | 4331182     | NM_016562.3    |
| <b>Mouse GAPDH (X20)</b>                          | Applied Biosystems |                                       | 4352339E    |                |
| <b>Influenza polymerase forward primer</b>        | Applied Biosystems | 5'-<br>CGGTCCAAATTCCTGCTGA-3'         |             |                |
| <b>Influenza polymerase reverse primer</b>        | Applied Biosystems | 5'-<br>CATTGGGTTCCCTCCA TCCA-<br>3-3' |             |                |

**Supplementary Table 2:** List of primers and their sources and reference sequences. The influenza polymerase primers were custom synthesized and the sequences are shown.
